# Supplementary material for: Carrying capacity of U.S. agricultural land: Ten diet scenarios
Source: Oxford University Press journal article supplement (doi:10.12952/journal.elementa.000116), 2016-01-01
Supplement: elementa_000116_s002.docx [file elementa_000116_s002.docx]

Table S2. Processing conversion parameter estimates obtained from non-standard sources

| Commodity | Units | Value | Notes |
| --- | --- | --- | --- |
| Canola oil | Kg oil kg canola seed-1 | 0.40 | 1 |
| Olive oil | Kg oil kg olives-1 | 0.15 | 2 |
| Refined cane and beet sugar | Kg sugar kg raw material-1 | 0.14 | 3 |
| Rice | Kg polished rice kg paddy rice-1 | 0.71 | 4 |
| Rice | Kg brown rice kg paddy rice-1 | 0.80 | 4 |
| Rye | Kg flour kg rye grain-1 | 0.87 | 5 |
| Soy milk | Kg soy milk kg soybean-1 | 6.0 | 6 |
| Tofu | Kg tofu kg soybean-1 | 2.5 | 7 |

1Authors’ calculations using oil content of canola from Mag 47 and yield of refined oil from crude oil from Agricultural Handbook No. 697 . 46

2 Authors’ calculations using oil yield (volume per acre) from Vossen 48 and oil density from Agricultural Handbook No. 697. 46

3 Personal communication with Stephen Haley, USDA Economic Research Service, March 2012.

4 From International Rice Research Institute. 49

5 Personal communication with Colleen Zammer, Bay State Milling, 04 January 2012

6 Personal communication with Melinda Anderson, University of Illinois Soybean Research Laboratory, 25 September 2012.

7 Personal communication with Karl Weingartner, University of Illinois Soybean Research Laboratory, 30 October 2012.
