# Supplementary material for: Carrying capacity of U.S. agricultural land: Ten diet scenarios
Source: Oxford University Press journal article supplement (doi:10.12952/journal.elementa.000116), 2016-01-01
Supplement: elementa_000116_s004.xlsx [file elementa_000116_s004.xlsx]

## Sheet: README
README
This workbook is a spreadsheet model for estimating the land requirements of the human diet. It has been parameterized for the continental USA. However, it is intended to serve as a general framework for making such estimations for other geographic areas. This worksheet explains the general format of the file and the relationships between worksheets. For a complete description of the methods, ple…
Worksheet name	Description
Users diet	Interface for an individual to use the model to examine a diet of interest.
Dietary recommendations	Reports the dietary recommendations of the 2010 Dietary Guidelines for Americans by age-gender cohort and an average for the U.S.
Food preferences	Reports estimated consumption from USDA loss-adjusted food supply data. Also includes assumptions about the individual food commodities that compose each food group.
Nutrient composition	Reports the nutrient composition of each individual food commodity included in the model.
Losses and waste	Reports the loss adjustment factors used to account for spoilage and waste in the food supply.
Processing conversions	Reports the conversion factors used to determine the weight of agricultural commodities used to create processed food commodities.
Dairy processing conversions	Tabulates the limiting fraction in fluid milk (milk fat or non-fat solids) that determines the conversion factor for dairy products.
Fats and oils	Reports assumptions about the individual plant oils and animal fats that compose particular food commodities in the added fats food group.
Food requirements	Tabulates annual per capita food needs on both primary food commodity and agricultural commodity bases.
Livestock feed requirements	Reports the aggregate feed needs per unit of food commodity output for six livestock products: beef, chicken, dairy, eggs, pork, and turkey.
Crop and grazing yields	Reports estimates of crop productivity and grazing land productivity used in the model.
Land requirements	Tabulates the raw estimates of land requirements per food commodity (or food commodity-feed ingredient combination).
Multiuse crop adjustment	Determines the adjustment needed to correct for possible double-counting of land needs for multi-use crops, such as soybean.
Grazing land adjustment	Determines the adjustment needed to allow cropland to substitute for grazing land in diet scenarios with high grazing land requirements.
Land availability	Tabulates area of land available for cultivated crops, perennial crops, and grazing.

## Sheet: Users diet
USER'S DIET, USA
This worksheet allows a user to enter the intake values for a diet of interest and see a summary of the land requirements, carrying capacity, and nutrient macronutrient composition.
Carrying capacity	(persons)	(% of total USA pop)
Population fed	7.34455e+08	2.37884
Land used	(acres)	(% of available)
Cultivated cropland	2.41772e+08	0.998542
Total cropland	3.31234e+08	1
Grazing land	6.42511e+08	0.86901
Dietary nutrient summary	Units	Value
Total energy	Kcal/day	2152.47
Protein	g/day	85.6652
Fat	g/day	65.9288
Carbohydrate	g/day	318.365
DIET ASSUMPTIONS
Food group	Food subgroup	Unit	Recommended value	Value	Cultivated cropland requirements	Perennial cropland requirements	Grazing land requirements
Grains	Whole and refined grains	oz	7.01335	7.01	0.0906272
Vegetables	Total vegetables	cups	2.78791	2.79	0.033137
	Dark green vegetables	cups	0.264009	0.26	0.00146621
	Red and Orange Vegetables	cups	0.821836	0.82	0.00637589
	Dry beans, lentils, and peas	cups	0.256375	0.26	0.0100783
	Starchy vegetables	cups	0.798465	0.8	0.00963703
	Other vegetables	cups	0.647223	0.65	0.0055795
Fruits	All fruit	cups	1.92049	1.92	0.026699
Dairy	All dairy	cups	2.89201	2	0.0301696	0.0362755	0
	Cow milk products	cups	no recommendation	2	0.0301696	0.0362755	0
	Fluid milk and yogurt	cups	no recommendation	1	n/a	n/a	n/a
	Cheese and other dairy	cups	no recommendation	1	n/a	n/a	n/a
	Soy milk	cups	no recommendation	0	0
Protein	All protein foods	meat oz equivalents	5.79776	5.78	0.133324	0.0816403	0.874813
	Dry beans, lentils, and peas	meat oz equivalents	no recommendation	1	0.00969071
	Nuts	meat oz equivalents	no recommendation	1	0.00534066
	Tofu	meat oz equivalents	no recommendation	0.5	0.00490991
	Beef	meat oz equivalents	no recommendation	0.75	0.0226365	0.0816403	0.874813
	Pork	meat oz equivalents	no recommendation	0.75	0.0336459
	Chicken	meat oz equivalents	no recommendation	0.6	0.0295918
	Turkey	meat oz equivalents	no recommendation	0.2	0.00856159
	Eggs	meat oz equivalents	no recommendation	0.5	0.0189469
	Fish	meat oz equivalents	no recommendation	0.48	0
Added fats	Plant oils	grams	28.0265	18	0.0486945
	Dairy fats	grams	no recommendation	5	0.0121861	0.0146524	0
	Animal fat (lard and tallow)	grams allowed in diet	no recommendation	3	n/a	n/a	n/a
Sweeteners	All sweeteners	tsp	13.4497	6.5	0.00607351
TOTALS					0.380911	0.132568	0.874813
Adjustments for multi-use crops (avoid double-counting)					0.0517257	n/a	n/a
Adjustments to make full use of grazing resource					n/a	0	0
Adjusted Totals					0.329185	0.132568	0.874813
Footprint of cultivated land (accounts for multicropping)					0.318425
Chart categories	Area harvested (acres person-1 yr-1)	Area harvested (% of total)	Land in crops, accounting for cropping intensity (acres person-1 yr-1)	Land in crops, accounting for cropping intensity (% of total)	Notes
Grains	0.0906272	0.208379	0.0876648	0.206487
Vegetables	0.0230586	0.0530187	0.0223049	0.0525374
Fruit	0.026699	0.0613891	0.0258263	0.0608317
Pulses	0.024679	0.0567443	0.0238723	0.0562292	Includes tofu and soy milk
Nuts	0.00534066	0.0122798	0.00516608	0.0121683
Feed grains and oilseeds	0.140521	0.3231	0.135928	0.320167
Sweeteners	0.00607351	0.0139648	0.00587498	0.013838
Hay	0.117916	0.271124	0.117916	0.277741
Pasture	0	0	0	0
TOTAL cropland	0.434915		0.424553

## Sheet: Dietary recommendations
NUTRITIONAL RECOMMENDATIONS
This worksheet reports the mean per capita daily dietary recommendations for the population of each state. The mean values are based on the MyPyramid (Food Planner) recommendations for each age-gender category and the demographic distribution of the population. Recommendations assume an activity level of 30-60 minutes per day.
Age cohorts	Percent of 2010 US population	Total kcal	Fat AMDR	Grains	Whole grains	Vegetables	Dark green vegetables	Red and Orange vegetables	Dry beans & peas	Starchy vegetables	Other vegetables	Fruit	Dairy	Meat & beans	Oil	Discretionary		Total kcal	Fat AMDR	Grains	Whole grains	Vegetables	Dark green vegetables	Orange vegetables	Dry beans & peas	Starchy vegetables	Other vegetables	Fruit	Dairy	Meat & beans	Oil	Discretionary
			% total kcal	oz	oz	cup	cups/week	cups/week	cups/week	cups/week	cups/week	cup	cup	oz	grams	kcal			% total kcal	oz	oz	cup	cups/week	cups/week	cups/week	cups/week	cups/week	cup	cup	oz	grams	kcal
male
0 to<6 months	0.00334237	842.4	0	0	0	0	0	0	0	0	0	0	0	0	0	0		2.81561	0	0	0	0	0	0	0	0	0	0	0	0	0	0
6 months to < 2 years	0.0100271	1078	0	0	0	0	0	0	0	0	0	0	0	0	0	0		10.8092	0	0	0	0	0	0	0	0	0	0	0	0	0	0
2 to < 3 years	0.00668475	1000	35	3	1.5	1	0.5	2.5	0.5	2	1.5	1	2	2	15	165		6.68475	0.233966	0.0200542	0.0100271	0.00668475	0.00334237	0.0167119	0.00334237	0.0133695	0.0100271	0.00668475	0.0133695	0.0133695	0.100271	1.10298
3 to < 4 years	0.00668475	1400	35	5	2.5	1.5	1	3	0.5	3.5	2.5	1.5	2	4	17	170		9.35864	0.233966	0.0334237	0.0167119	0.0100271	0.00668475	0.0200542	0.00334237	0.0233966	0.0167119	0.0100271	0.0133695	0.026739	0.113641	1.13641
4 to < 5 years	0.00668475	1400	30	5	2.5	1.5	1	3	0.5	3.5	2.5	1.5	2	4	17	170		9.35864	0.200542	0.0334237	0.0167119	0.0100271	0.00668475	0.0200542	0.00334237	0.0233966	0.0167119	0.0100271	0.0133695	0.026739	0.113641	1.13641
5 to 9 years	0.0336511	1600	30	5	3	2	1.5	4	1	4	3.5	1.5	2	5	22	130		53.8418	1.00953	0.168256	0.100953	0.0673023	0.0504767	0.134605	0.0336511	0.134605	0.117779	0.0504767	0.0673023	0.168256	0.740325	4.37465
10 to 14 years	0.0342673	2200	30	7	3.5	3	2	6	2	6	5	2	3	6	29	290		75.388	1.02802	0.239871	0.119935	0.102802	0.0685345	0.205604	0.0685345	0.205604	0.171336	0.0685345	0.102802	0.205604	0.99375	9.9375
15 to 19 years	0.0366116	2800	30	10	5	3.5	2.5	7	2.5	7	5.5	2.5	3	7	36	425		102.512	1.09835	0.366116	0.183058	0.128141	0.091529	0.256281	0.091529	0.256281	0.201364	0.091529	0.109835	0.256281	1.31802	15.5599
20 to 24 years	0.035674	2800	27.5	10	5	3.5	2.5	7	2.5	7	5.5	2.5	3	7	36	425		99.8871	0.981034	0.35674	0.17837	0.124859	0.0891849	0.249718	0.0891849	0.249718	0.196207	0.0891849	0.107022	0.249718	1.28426	15.1614
25 to 34 years	0.0668256	2600	27.5	9	4.5	3.5	2.5	7	2.5	7	5.5	2	3	6.5	31	410		173.746	1.8377	0.60143	0.300715	0.233889	0.167064	0.467779	0.167064	0.467779	0.367541	0.133651	0.200477	0.434366	2.07159	27.3985
35 to 44 years	0.0661904	2600	27.5	9	4.5	3.5	2.5	7	2.5	7	5.5	2	3	6.5	31	410		172.095	1.82024	0.595714	0.297857	0.231666	0.165476	0.463333	0.165476	0.463333	0.364047	0.132381	0.198571	0.430238	2.0519	27.1381
45 to 54 years	0.0717172	2400	27.5	8	4	3	2	6	2	6	5	2	3	6.5	31	360		172.121	1.97222	0.573737	0.286869	0.215152	0.143434	0.430303	0.143434	0.430303	0.358586	0.143434	0.215152	0.466162	2.22323	25.8182
55 to 59 years	0.0308463	2400	27.5	8	4	3	2	6	2	6	5	2	3	6.5	31	360		74.031	0.848272	0.24677	0.123385	0.0925388	0.0616925	0.185078	0.0616925	0.185078	0.154231	0.0616925	0.0925388	0.200501	0.956234	11.1047
60 to 64 years	0.0261623	2400	27.5	8	4	3	2	6	2	6	5	2	3	6.5	31	360		62.7896	0.719464	0.209299	0.104649	0.078487	0.0523246	0.156974	0.0523246	0.156974	0.130812	0.0523246	0.078487	0.170055	0.811032	9.41844
65 to 74 years	0.0327017	2200	27.5	7	3.5	3	2	6	2	6	5	2	3	6	29	290		71.9438	0.899298	0.228912	0.114456	0.0981052	0.0654035	0.19621	0.0654035	0.19621	0.163509	0.0654035	0.0981052	0.19621	0.948351	9.48351
75 to 84 years	0.0177388	2200	27.5	7	3.5	3	2	6	2	6	5	2	3	6	29	290		39.0253	0.487816	0.124171	0.0620856	0.0532163	0.0354775	0.106433	0.0354775	0.106433	0.0886938	0.0354775	0.0532163	0.106433	0.514424	5.14424
85 years and over	0.00579661	2200	27.5	7	3.5	3	2	6	2	6	5	2	3	6	29	290		12.7526	0.159407	0.0405763	0.0202882	0.0173898	0.0115932	0.0347797	0.0115932	0.0347797	0.0289831	0.0115932	0.0173898	0.0347797	0.168102	1.68102
female
0 to<6 months	0.00320067	842.4	0	0	0	0	0	0	0	0	0	0	0	0	0	0		2.69625	0	0	0	0	0	0	0	0	0	0	0	0	0	0
6 months to < 2 years	0.00960202	1078	0	0	0	0	0	0	0	0	0	0	0	0	0	0		10.351	0	0	0	0	0	0	0	0	0	0	0	0	0	0
2 to < 3 years	0.00640135	1000	35	3	1.5	1	0.5	2.5	0.5	2	1.5	1	2	2	15	165		6.40135	0.224047	0.019204	0.00960202	0.00640135	0.00320067	0.0160034	0.00320067	0.0128027	0.00960202	0.00640135	0.0128027	0.0128027	0.0960202	1.05622
3 to < 4 years	0.00640135	1200	35	4	2	1.5	1	3	0.5	3.5	2.5	1	2	3	17	170		7.68162	0.224047	0.0256054	0.0128027	0.00960202	0.00640135	0.019204	0.00320067	0.0224047	0.0160034	0.00640135	0.0128027	0.019204	0.108823	1.08823
4 to < 5 years	0.00640135	1400	30	5	2.5	1.5	1	3	0.5	3.5	2.5	1.5	2	4	17	170		8.96188	0.19204	0.0320067	0.0160034	0.00960202	0.00640135	0.019204	0.00320067	0.0224047	0.0160034	0.00960202	0.0128027	0.0256054	0.108823	1.08823
5 to 9 years	0.0322564	1600	30	5	3	2	1.5	4	1	4	3.5	1.5	2	5	22	130		51.6102	0.967692	0.161282	0.0967692	0.0645128	0.0483846	0.129026	0.0322564	0.129026	0.112897	0.0483846	0.0645128	0.161282	0.709641	4.19333
10 to 14 years	0.0327044	2000	30	6	3	2.5	1.5	5.5	1.5	5	4	2	3	5.5	27	265		65.4088	0.981131	0.196226	0.0981131	0.081761	0.0490566	0.179874	0.0490566	0.163522	0.130818	0.0654088	0.0981131	0.179874	0.883018	8.66666
15 to 19 years	0.0347752	2000	30	6	3	2.5	1.5	5.5	1.5	5	4	2	3	5.5	27	265		69.5503	1.04325	0.208651	0.104325	0.0869379	0.0521627	0.191263	0.0521627	0.173876	0.139101	0.0695503	0.104325	0.191263	0.938929	9.21542
20 to 24 years	0.0342412	2200	27.5	7	3.5	3	2	6	2	6	5	2	3	6	29	290		75.3307	0.941633	0.239689	0.119844	0.102724	0.0684824	0.205447	0.0684824	0.205447	0.171206	0.0684824	0.102724	0.205447	0.992995	9.92995
25 to 34 years	0.066177	2200	27.5	7	3.5	3	2	6	2	6	5	2	3	6	29	290		145.589	1.81987	0.463239	0.23162	0.198531	0.132354	0.397062	0.132354	0.397062	0.330885	0.132354	0.198531	0.397062	1.91913	19.1913
35 to 44 years	0.0668337	2000	27.5	6	3	2.5	1.5	5.5	1.5	5	4	2	3	5.5	27	265		133.667	1.83793	0.401002	0.200501	0.167084	0.100251	0.367585	0.100251	0.334169	0.267335	0.133667	0.200501	0.367585	1.80451	17.7109
45 to 54 years	0.0740557	2000	27.5	6	3	2.5	1.5	5.5	1.5	5	4	2	3	5.5	27	265		148.111	2.03653	0.444334	0.222167	0.185139	0.111084	0.407306	0.111084	0.370278	0.296223	0.148111	0.222167	0.407306	1.9995	19.6248
55 to 59 years	0.0328463	2000	27.5	6	3	2.5	1.5	5.5	1.5	5	4	2	3	5.5	27	265		65.6927	0.903274	0.197078	0.098539	0.0821158	0.0492695	0.180655	0.0492695	0.164232	0.131385	0.0656927	0.098539	0.180655	0.886851	8.70428
60 to 64 years	0.0283095	1800	27.5	6	3	2.5	1.5	5.5	1.5	5	4	1.5	3	5	24	195		50.9571	0.778511	0.169857	0.0849284	0.0707737	0.0424642	0.155702	0.0424642	0.141547	0.113238	0.0424642	0.0849284	0.141547	0.679427	5.52035
65 to 74 years	0.0376262	1800	27.5	6	3	2.5	1.5	5.5	1.5	5	4	1.5	3	5	24	195		67.7271	1.03472	0.225757	0.112878	0.0940654	0.0564392	0.206944	0.0564392	0.188131	0.150505	0.0564392	0.112878	0.188131	0.903028	7.3371
75 to 84 years	0.0245651	1800	27.5	6	3	2.5	1.5	5.5	1.5	5	4	1.5	3	5	24	195		44.2172	0.67554	0.147391	0.0736953	0.0614127	0.0368476	0.135108	0.0368476	0.122825	0.0982603	0.0368476	0.0736953	0.122825	0.589562	4.79019
85 years and over	0.0119961	1600	27.5	5	3	2	1.5	4	1	4	3.5	1.5	3	5	22	130		19.1938	0.329894	0.0599807	0.0359884	0.0239923	0.0179942	0.0479846	0.0119961	0.0479846	0.0419865	0.0179942	0.0359884	0.0599807	0.263915	1.5595
weighted averages (servings)																		2151.96	28.2596	7.01335	3.54667	2.78791	1.84806	5.75285	1.79463	5.58925	4.53056	1.92049	2.89201	5.79776	28.0265	292.939
For complete details on these calculations see the following workbook:
Step 1 Kellogg_WeightedAvg_with2010census.xlsx
updated March 2012 JP

## Sheet: Food preferences
FOOD PREFERENCES
This worksheet reports consumers "preference" for foods based on the Loss-adjusted Food Supply Data from USDA Economic Research Service. Estimated per capita "intake" (disappearance - food system losses) is reported by food commodity. Values shown are a three-year average for the years 2006-2008. The relative preference for individual commodities within a food group is derived from the per capita…
Food group	Food commodity	Preparation	Serving Size	Daily per capita consumption U.S. [servings/day]	Preference relative to other foods in group		Commerical production of food within study area	Adjusted preference relative to other foods1	Notes
Grains	White & Whole flour	NA	Ounces	4.85691	0.634028		1	0.634028
Grains	Durum flour	NA	Ounces	0.369302	0.0482092		1	0.0482092
Grains	Corn flour and meal	NA	Ounces	0.953803	0.124511		1	0.124511
Grains	Hominy and grits	NA	Ounces	0.389319	0.0508222		1	0.0508222
Grains	Cornstarch	NA	Ounces	0.307955	0.040201		1	0.040201
Grains	Rye Flour	NA	Ounces	0.0189778	0.00247739		1	0.00247739
Grains	Rice	NA	Ounces	0.639665	0.0835028		1	0.0835028
Grains	Oat products	NA	Ounces	0.108891	0.0142148		1	0.0142148
Grains	Barley products	NA	Ounces	0.015575	0.00203318		1	0.00203318
Dark Green Leafy Vegetables	Broccoli	Fresh	Cups	0.0273959	0.167244		1	0.167244
Dark Green Leafy Vegetables	Broccoli	Frozen	Cups	0.0101744	0.0621114		1	0.0621114
Dark Green Leafy Vegetables	Collard Greens	Fresh	Cups	0.00353652	0.0215894		1	0.0215894
Dark Green Leafy Vegetables	Escarole /endive	Fresh	Cups	0.00182095	0.0111164		1	0.0111164
Dark Green Leafy Vegetables	Kale	Fresh	Cups	0.00137723	0.00840756		1	0.00840756
Dark Green Leafy Vegetables	Romaine & Leaf Lettuce	Fresh	Cups	0.0978708	0.597473		1	0.597473
Dark Green Leafy Vegetables	Mustard Greens	Fresh	Cups	0.00201884	0.0123244		1	0.0123244
Dark Green Leafy Vegetables	Spinach	Fresh	Cups	0.0153442	0.0936718		1	0.0936718
Dark Green Leafy Vegetables	Spinach	Frozen	Cups	0.00205344	0.0125356		1	0.0125356
Dark Green Leafy Vegetables	Turnip greens	Fresh	Cups	0.00221581	0.0135269		1	0.0135269
Red and Orange Vegetables	Carrots	Fresh	Cups	0.0529906	0.175306		1	0.175306
Red and Orange Vegetables	Carrots	Canned	Cups	0.00555257	0.0183693		1	0.0183693
Red and Orange Vegetables	Carrots	Frozen	Cups	0.00626637	0.0207307		1	0.0207307
Red and Orange Vegetables	Pumpkin	Fresh	Cups	0.0211646	0.0700178		1	0.0700178
Red and Orange Vegetables	Winter Squash	Fresh	Cups	0.0124411	0.0411584		1	0.0411584
Red and Orange Vegetables	Sweet Potatoes	Fresh	Cups	0.0129517	0.0428474		1	0.0428474
Red and Orange Vegetables	Tomatoes	Fresh	Cups	0.0708997	0.234554		1	0.234554
Red and Orange Vegetables	Tomatoes	Canned	Cups	0.120008	0.397016		1	0.397016
Dry Bean & Peas	Dry edible beans	Dried	Cups	0.0927305	0.866946		1	0.866946
Dry Bean & Peas	Dry peas and lentils	Dried	Cups	0.0142317	0.133054		1	0.133054
Starchy Vegetables	Green Peas	Canned	Cups	0.00452437	0.00976481		1	0.00976481
Starchy Vegetables	Green Peas	Frozen	Cups	0.0101677	0.0219448		1	0.0219448
Starchy Vegetables	Lima beans	Fresh	Cups	4.34479e-05	9.37722e-05		1	9.37722e-05
Starchy Vegetables	Lima beans	Frozen	Cups	0.00146894	0.00317038		1	0.00317038
Starchy Vegetables	Potatoes	Fresh	Cups	0.196506	0.424113		1	0.424113
Starchy Vegetables	Potatoes	Canned	Cups	0.00359808	0.00776564		1	0.00776564
Starchy Vegetables	Potatoes	Frozen	Cups	0.116426	0.251279		1	0.251279
Starchy Vegetables	Potatoes	DeHydrated	Cups	0.0774064	0.167064		1	0.167064
Starchy Vegetables	Sweet Corn	Fresh	Cups	0.00265643	0.0057333		1	0.0057333
Starchy Vegetables	Sweet Corn	Canned	Cups	0.0343602	0.0741587		1	0.0741587
Starchy Vegetables	Sweet Corn	Frozen	Cups	0.0161762	0.0349126		1	0.0349126
Other Vegetables	Artichokes	Fresh	Cups	0.00184609	0.00349437		1	0.00368157
Other Vegetables	Asparagus	Fresh	Cups	0.00291131	0.00551067		1	0.00580588
Other Vegetables	Asparagus	Canned	Cups	0.000623249	0.00117972		1	0.00124291
Other Vegetables	Asparagus	Frozen	Cups	0.000225852	0.000427503		1	0.000450405
Other Vegetables	Bell peppers	Fresh	Cups	0.0345783	0.0654515		1	0.0689579
Other Vegetables	Brussels sprouts	Fresh	Cups	0.00223458	0.00422972		1	0.00445631
Other Vegetables	Cabbage	Fresh	Cups	0.0557776	0.105578		1	0.111234
Other Vegetables	Cabbage	Canned	Cups	0.00388059	0.00734536		1	0.00773886
Other Vegetables	Cauliflower	Fresh	Cups	0.00312744	0.00591977		1	0.0062369
Other Vegetables	Cauliflower	Frozen	Cups	0.0013661	0.00258583		1	0.00272435
Other Vegetables	Celery	Fresh	Cups	0.0467106	0.088416		1	0.0931526
Other Vegetables	Chilly Peppers	Canned	Cups	0.035013	0.0662744		1	0.0698248
Other Vegetables	Cucumbers	Fresh	Cups	0.0309314	0.0585484		1	0.0616849
Other Vegetables	Cucumbers	Canned	Cups	0.00854033	0.0161655		1	0.0170316
Other Vegetables	Eggplant	Fresh	Cups	0.00536562	0.0101563		1	0.0107004
Other Vegetables	Garlic	Fresh	Cups	0.0131185	0.0248313		1	0.0261616
Other Vegetables	Head lettuce	Fresh	Cups	0.117369	0.222161		1	0.234063
Other Vegetables	Mushrooms	Fresh	Cups	0.0206572	0.0391009		0	0	Mushrooms are not grown on cropland. Hence, consumption was zeroed.
Other Vegetables	Mushrooms	Canned	Cups	0.00620589	0.0117468		0	0	Mushrooms are not grown on cropland. Hence, consumption was zeroed.
Other Vegetables	Okra	Fresh	Cups	0.00228471	0.0043246		1	0.00455628
Other Vegetables	Onions	Fresh	Cups	0.0733833	0.138903		1	0.146345
Other Vegetables	Onions	Dehydrated	Cups	0.00584115	0.0110564		1	0.0116487
Other Vegetables	Radishes	Fresh	Cups	0.00300467	0.00568739		1	0.00599207
Other Vegetables	Snap beans	Fresh	Cups	0.0122293	0.0231481		1	0.0243882
Other Vegetables	Snap beans	Canned	Cups	0.0166818	0.0315761		1	0.0332677
Other Vegetables	Snap beans	Frozen	Cups	0.011956	0.0226309		1	0.0238433
Other Vegetables	Summer Squa	Fresh	Cups	0.0124411	0.0235492		1	0.0248108
Citrus	Orange	Fresh	Cups	0.027697	0.0320885		1	0.0371896
Citrus	Orange	Juice	Cups	0.15331	0.177618		1	0.205854
Citrus	Grapefruit	Fresh	Cups	0.00359189	0.00416141		1	0.00482295
Citrus	Grapefruit	Juice	Cups	0.0112738	0.0130613		1	0.0151377
Citrus	Lemons	Fresh	Cups	0.00514228	0.00595761		1	0.0069047
Citrus	Lemons	Juice	Cups	0.00507567	0.00588044		1	0.00681526
Citrus	Limes	Fresh	Cups	0.0077954	0.00903139		1	0.0104671
Citrus	Limes	Juice	Cups	0.000990496	0.00114754		1	0.00132997
Citrus	Tangerines	Fresh	Cups	0.00722907	0.00837528		1	0.0097067
Non-Citrus	Apples	Fresh	Cups	0.114686	0.13287		1	0.153993
Non-Citrus	Apples & Applesauce	Canned	Cups	0.014457	0.0167493		1	0.0194119
Non-Citrus	Apples	Frozen	Cups	0.000170328	0.000197334		1	0.000228705
Non-Citrus	Apples	Dried	Cups	0.00281846	0.00326534		1	0.00378443
Non-Citrus	Apples	Juice	Cups	0.0821049	0.095123		1	0.110245
Non-Citrus	Apricots	Fresh	Cups	0.000413367	0.000478909		1	0.000555042
Non-Citrus	Apricots	Canned	Cups	0.000421908	0.000488804		1	0.000566509
Non-Citrus	Apricots	Frozen	Cups	0.00418197	0.00484504		1	0.00561526
Non-Citrus	Apricots	Dried	Cups	0.00190747	0.0022099		1	0.00256122
Non-Citrus	Avocados	Fresh	Cups	0.0141609	0.0164062		1	0.0190143
Non-Citrus	Bananas	Fresh	Cups	0.081897	0.0948822		0	0	Commercial production in U.S. occurs only in Hawaii.
Non-Citrus	Blackberries	Frozen	Cups	0.000636774	0.000737737		1	0.000855016
Non-Citrus	Blueberries	Fresh	Cups	0.00357726	0.00414445		1	0.00480329
Non-Citrus	Blueberries	Frozen	Cups	0.0116966	0.0135512		1	0.0157055
Non-Citrus	Cantaloup	Fresh	Cups	0.018316	0.0212201		1	0.0245934
Non-Citrus	Cherries	Fresh	Cups	0.00553492	0.0064125		1	0.00743191
Non-Citrus	Cherries	Canned	Cups	0.000563415	0.000652746		1	0.000756514
Non-Citrus	Cherries	Frozen	Cups	0.00454746	0.00526848		1	0.00610602
Non-Citrus	Cranberries	Fresh	Cups	0.000782083	0.000906086		1	0.00105013
Non-Citrus	Cranberries	Juice	Cups	0.00915035	0.0106012		1	0.0122865
Non-Citrus	Dates	Dried	Cups	0.00200862	0.00232709		1	0.00269704
Non-Citrus	Figs	Dried	Cups	0.00112334	0.00130145		1	0.00150834
Non-Citrus	Grapes	Fresh	Cups	0.041542	0.0481287		1	0.0557798
Non-Citrus	Grapes	Juice	Cups	0.0178425	0.0206715		1	0.0239577
Non-Citrus	Honeydew melons	Fresh	Cups	0.00237411	0.00275054		1	0.00318779
Non-Citrus	Kiwifruit	Fresh	Cups	0.00168458	0.00195168		1	0.00226194
Non-Citrus	Mangoes	Fresh	Cups	0.00631026	0.00731078		0	0
Non-Citrus	Olives	Canned	Cups	0.00704817	0.00816568		1	0.00946379
Non-Citrus	Peaches	Fresh	Cups	0.0185011	0.0214346		1	0.0248421
Non-Citrus	Peaches	Canned	Cups	0.0112647	0.0130508		1	0.0151255
Non-Citrus	Peaches	Frozen	Cups	0.00358697	0.0041557		1	0.00481634
Non-Citrus	Peaches	Dried	Cups	0.000508141	0.000588709		1	0.000682297
Non-Citrus	Pears	Fresh	Cups	0.0133611	0.0154795		1	0.0179403
Non-Citrus	Pears	Canned	Cups	0.00996237	0.0115419		1	0.0133768
Non-Citrus	Pears	Dried	Cups	3.14194e-05	3.64011e-05		1	4.21879e-05
Non-Citrus	Pineapple	Fresh	Cups	0.00966327	0.0111954		0	0	Commercial production in U.S. occurs only in Hawaii.
Non-Citrus	Pineapple	Canned	Cups	0.0112518	0.0130359		0	0	Commercial production in U.S. occurs only in Hawaii.
Non-Citrus	Pineapple	Juice	Cups	0.00927154	0.0107416		0	0	Commercial production in U.S. occurs only in Hawaii.
Non-Citrus	Papayas	Fresh	Cups	0.00170225	0.00197215		1	0.00228567	Commercial production in U.S. occurs only in Hawaii.
Non-Citrus	Plums	Fresh	Cups	0.00430712	0.00499003		1	0.0057833
Non-Citrus	Plums	Canned	Cups	6.01034e-05	6.96331e-05		1	8.07027e-05
Non-Citrus	Plums & Prunes	Frozen	Cups	4.41784e-05	5.11831e-05		1	5.93198e-05
Non-Citrus	Plums	Dried	Cups	0.00364863	0.00422714		1	0.00489913
Non-Citrus	Prunes	Juice	Cups	0.00146393	0.00169604		1	0.00196567
Non-Citrus	Raisins	Dried	Cups	0.021339	0.0247224		1	0.0286525
Non-Citrus	Raspberry	Fresh	Cups	0.00208911	0.00242034		1	0.00280511
Non-Citrus	Raspberry	Frozen	Cups	0.00252149	0.00292129		1	0.00338569
Non-Citrus	Strawberries	Fresh	Cups	0.0316873	0.0367114		1	0.0425475
Non-Citrus	Strawberries	Frozen	Cups	0.00318822	0.00369373		1	0.00428093
Non-Citrus	Watermelon	Fresh	Cups	0.0296274	0.0343249		1	0.0397816
Dairy	beverage milk	plain whole milk	Cups	0.190069	0.27978		1	0.27978
Dairy	beverage milk	plain 2 percent milk	Cups	0.217973	0.320853		1	0.320853
Dairy	beverage milk	plain 1 percent milk	Cups	0.0791269	0.116474		1	0.116474
Dairy	beverage milk	plain skim milk	Cups	0.0970944	0.142922		1	0.142922
Dairy	beverage milk	flavored whole milk	Cups	0.0075915	0.0111746		1	0.0111746
Dairy	beverage milk	flavored lower fat milk	Cups	0.0432569	0.0636737		1	0.0636737
Dairy	yogurt	yogurt	Cups	0.0442412	0.0651225		1	0.0651225
Dairy	American	cheddar	Cups	0.241878	0.241044		1	0.241044
Dairy	Italian	Provolone	Cups	0.0277781	0.0276823		1	0.0276823
Dairy	Italian	Romano	Cups	0.00672508	0.0067019		1	0.0067019
Dairy	Italian	Parmesean	Cups	0.0163863	0.0163298		1	0.0163298
Dairy	Italian	Mozzarella	Cups	0.256661	0.255776		1	0.255776
Dairy	Italian	Ricotta	Cups	0.00695485	0.00693087		1	0.00693087
Dairy	Misc. Cheese	Swiss	Cups	0.0298329	0.02973		1	0.02973
Dairy	Misc. Cheese	Brick	Cups	0.00060034	0.00059827		1	0.00059827
Dairy	Misc. Cheese	Muenster	Cups	0.00838449	0.00835558		1	0.00835558
Dairy	Misc. Cheese	Blue	Cups	0.0046908	0.00467463		1	0.00467463
Dairy	Misc. Cheese	other	Cups	0.111	0.110617		1	0.110617
Dairy	cottage cheese	regular	Cups	0.00223225	0.00222456		1	0.00222456
Dairy	cottage cheese	lowfat	Cups	0.00261892	0.00260989		1	0.00260989
Dairy	frozen dairy	ice cream	Cups	0.0576953	0.0574963		1	0.0574963
Dairy	frozen dairy	lowfat ice cream	Cups	0.0279589	0.0278625		1	0.0278625
Dairy	frozen dairy	other	Cups	0.0176476	0.0175867		1	0.0175867
Dairy	evaporated and condensed milk	canned whole	Cups	0.0107385	0.0107015		1	0.0107015
Dairy	evaporated and condensed milk	bulk whole	Cups	0.00449391	0.00447842		1	0.00447842
Dairy	evaporated and condensed milk	skim	Cups	0.0340206	0.0339034		1	0.0339034
Dairy	dry milk	whole	Cups	0.00209516	0.00208794		1	0.00208794
Dairy	dry milk	nonfat	Cups	0.123122	0.122697		1	0.122697
Dairy	dry milk	buttermilk	Cups	0.00994494	0.00991065		1	0.00991065
Dairy Substitute - Vegan Option	Nonfat SoyMilk	Soymilk	Cups	NA	not included in food supply data		1	n/a	Intake entered directly into "Users diet" worksheet
Meat Substitute - Vegan Option	Nonfat Tofu	Tofu	Meat equivalent oz.	NA	not included in food supply data		1	n/a	Intake entered directly into "Users diet" worksheet
Protein rich foods	Dry edible beans	Dried	Cups	0.0927305	0.866946		1	0.866946
Protein rich foods	Dry peas and lentils	Dried	Cups	0.0142317	0.133054		1	0.133054
Protein rich foods	beef	cooked	Meat equivalent oz.	1.77002	0.265491		1	n/a	Intake entered directly into "Users diet" worksheet
Protein rich foods	veal	cooked	Meat equivalent oz.	0.00722404	0.00108356		1	n/a	Intake entered directly into "Users diet" worksheet
Protein rich foods	pork	cooked	Meat equivalent oz.	1.18706	0.178051		1	n/a	Intake entered directly into "Users diet" worksheet
Protein rich foods	lamb	cooked	Meat equivalent oz.	0.0193564	0.00290333		1	n/a	Intake entered directly into "Users diet" worksheet
Protein rich foods	chicken	cooked	Meat equivalent oz.	1.51165	0.226737		1	n/a	Intake entered directly into "Users diet" worksheet
Protein rich foods	turkey	cooked	Meat equivalent oz.	0.393441	0.0590136		1	n/a	Intake entered directly into "Users diet" worksheet
Protein rich foods	fish and shellfish	fresh and frozen	Meat equivalent oz.	0.321789	0.0482662		1	0.672676
Protein rich foods	salmon	canned	Meat equivalent oz.	0.00718257	0.00107734		1	0.0150146
Protein rich foods	sardines	canned	Meat equivalent oz.	0.00733423	0.00110009		1	0.0153317
Protein rich foods	tuna	canned	Meat equivalent oz.	0.103197	0.0154788		1	0.215725
Protein rich foods	shellfish	canned	Meat equivalent oz.	0.0158534	0.0023779		1	0.0331403
Protein rich foods	other	canned	Meat equivalent oz.	0.0115387	0.00173073		1	0.0241208
Protein rich foods	cured	cured	Meat equivalent oz.	0.0114766	0.00172141		1	0.0239909
Protein rich foods	eggs	cooked	Meat equivalent oz.	0.533997	0.080096		1	n/a	Intake entered directly into "Users diet" worksheet
Protein rich foods	peanuts	raw	Meat equivalent oz.	0.474531	0.0711764		1	0.768335
Protein rich foods	coconuts	raw	Meat equivalent oz.	0.0414935	0.00622375		0	0
Protein rich foods	almonds	raw	Meat equivalent oz.	0.0868251	0.0130232		1	0.140583
Protein rich foods	hazelnuts	raw	Meat equivalent oz.	0.00420413	0.000630592		1	0.00680711
Protein rich foods	pecans	raw	Meat equivalent oz.	0.033331	0.00499943		0	0	Grown commercially, but yield data unavailable.
Protein rich foods	walnuts	raw	Meat equivalent oz.	0.0311438	0.00467136		1	0.0504264
Protein rich foods	macadamia nuts	raw	Meat equivalent oz.	0.00869204	0.00130375		1	0.0140737
Protein rich foods	pistachios	raw	Meat equivalent oz.	0.0122133	0.00183191		1	0.0197751
Protein rich foods	other nuts	raw	Meat equivalent oz.	0.0734185	0.0110123		0	0	Includes nuts not grown commercially in the U.S.
Added fats	butter		Grams	3.78364	0.521385		1	0.521385
Added fats	margarine		Grams	2.61143	0.0405099		1	0.0424213
	margarine component - soybean oil						1
	margarine component - corn oil						0		Excluded from initial calculations. May be added back in multiuse crop adjustment.
	margarine component - animal fats from beef and pork						0		Excluded from initial calculations. May be added back in multiuse crop adjustment.
Added fats	lard		Grams	0.896028	0.0138997		0	0	Excluded from initial calculations. May be added back in multiuse crop adjustment.
Added fats	edible beef tallow		Grams	2.00843	0.0311559		0	0	Excluded from initial calculations. May be added back in multiuse crop adjustment.
Added fats	shortening		Grams	17.7609	0.275518		1	0.288517
	shortening component - soybean oil						1
	shortening component - cottonseed oil						0		Excluded. Non-food crop.
	shortening component - corn oil						0		Excluded from initial calculations. May be added back in multiuse crop adjustment.
	shortening component - lard						0		Excluded from initial calculations. May be added back in multiuse crop adjustment.
	shortening component - edible tallow						0		Excluded from initial calculations. May be added back in multiuse crop adjustment.
Added fats	salad and cooking oils		Grams	39.0306	0.605466		1	0.634032
	salad oil component - soybean oil						1
	salad oil component - cottonseed oil						0		Excluded. Non-food crop.
	salad oil component - corn oil						0		Excluded from initial calculations. May be added back in multiuse crop adjustment.
	salad oil component - canola oil						1
	salad oil component - olive oil						1
Added fats	other edible fats and oils		Grams	2.15638	0.0334511		1	0.0350293
	other component - soybean oil						1
	other component - cottonseed oil						0		Excluded. Non-food crop.
	other component - corn oil						0		Excluded from initial calculations. May be added back in multiuse crop adjustment.
	other component - peanut oil						1
	other component - canola oil						1
Added fats	light cream		Grams	1.39537	0.192282		1	0.192282
Added fats	half and half		Grams	0.29587	0.0407708		1	0.0407708
Added fats	heavy cream		Grams	0.397458	0.0547697		1	0.0547697
Added fats	sour cream		Grams	0.696628	0.0959952		1	0.0959952
Added fats	cream cheese		Grams	0.669534	0.0922616		1	0.0922616
Added fats	eggnog		Grams	0.0183989	0.00253536		1	0.00253536
Sweeteners	Refined Cane & Beet Sugar	NA	Teaspoons	13.3457	0.461672		1	0.466688
Sweeteners	HFCS	NA	Teaspoons	11.7646	0.406976		1	0.411398
Sweeteners	Glucose	NA	Teaspoons	2.86653	0.0991629		1	0.10024
Sweeteners	Dextrose	NA	Teaspoons	0.619793	0.0214407		1	0.0216737
Sweeteners	Edible syrups	NA	Teaspoons	0.0938987	0.00324827		0	0	Maple syrup not grown on cropland or grazing land, hence outside model scope.
Sweeteners	Honey	NA	Teaspoons	0.216823	0.00750063		0	0	Land requirement of honey is unclear, hence removed from model.
n/a = not applicable because the preferences for the individual food item are set directly on the 'Users diet' worksheet.
1 - The adjusted preference distributes the servings among foods that can be produced commercially within the study area.

## Sheet: Nutrient composition
FOOD COMPOSITION
This worksheet contains estimates of the nutritional composition of each primary food commodity. Values are reported for the following nutrients: water, total energy, protein, lipids, carbohydrates, sugars, saturated fats, and cholesterol. Data were obtained from the USDA Nutrient Database for Standard Reference. User defined rows allow additional foods with their nutritional information to be ad…
Food group	Food commodity	NNDB Description	Preparation	Serving description	Serving size (g)	Water (g/serving)	Energy (kcal/serving)	Protein (g/serving)	Lipid (g/serving)	Carbohydrate (g/serving)	Sugars (g/serving)	Saturated fat (g/serving)	Cholesterol (mg/serving)
Grains	White & Whole flour	'WHEAT FLOUR,WHOLE-GRAIN & WHEAT FLR,WHITE,ALL-PURPOSE,ENR,BLEACHED	n/a	Ounces	28.4	3.21772	99.968	3.34268	0.49416	21.0558	0.09656	0.08307	0
Grains	Durum flour	WHEAT,DURUM	n/a	Ounces	28.4	3.10696	96.276	3.88512	0.70148	20.2009	0	0.128936	0
Grains	Corn flour and meal	CORN FLR,WHOLE-GRAIN,YEL & CORNMEAL,WHOLE-GRAIN,YEL	n/a	Ounces	28.4	3.00614	102.666	2.1371	1.0579	21.8311	0.18176	0.148816	0
Grains	Hominy and grits	CEREALS,QUAKER,HOMINY GRITS,WHITE,QUICK,DRY & CEREALS,QUAKER,HOMINY GRITS,YEL,QUICK,DRY	n/a	Ounces	28.4	3.15524	97.128	2.38418	0.42884	22.2826	0.29536	0.10082	0
Grains	Cornstarch	CORNSTARCH	n/a	Ounces	28.4	2.36288	108.204	0.07384	0.0142	25.9207	0	0.002556	0
Grains	Rye Flour	RYE FLOUR,DARK, MEDIUM & LIGHT	n/a	Ounces	28.4	3.13536	97.6013	3.46575	0.47996	20.8967	0.410853	0.0567053	0
Grains	Rice	RICE,WHITE,LONG-GRAIN,MEDIUM-GRAIN & SHORT-GRAIN REG,RAW,UNENR & RICE,BROWN,LONG-GRAIN & MEDIUM-GRAIN,RAW	n/a	Ounces	28.4	3.43867	103.092	2.02662	0.418048	22.2571	0.13774	0.0907664	0
Grains	Oat products	OATS	n/a	Ounces	28.4	2.33448	110.476	4.79676	1.9596	18.8207	0	0.345628	0
Grains	Barley products	BARLEY,HULLED	n/a	Ounces	28.4	2.68096	100.536	3.54432	0.6532	20.8683	0.2272	0.136888	0
Grains -- User Defined
Dark Green Leafy Vegetables	Broccoli	BROCCOLI,RAW	Fresh	1 cup	91	81.263	30.94	2.5662	0.3367	6.0424	1.547	0.03549	0
Dark Green Leafy Vegetables	Broccoli	BROCCOLI,FRZ,CHOPD,UNPREP	Frozen	1 cup	156	142.678	40.56	4.3836	0.4524	7.4568	2.106	0.06864	0
Dark Green Leafy Vegetables	Collard Greens	COLLARDS,RAW	Fresh	1 cup	36	32.598	10.8	0.882	0.1512	2.0484	0.1656	0.0198	0
Dark Green Leafy Vegetables	Escarole /endive	ENDIVE,RAW	Fresh	1 cup	50	46.895	8.5	0.625	0.1	1.675	0.125	0.024	0
Dark Green Leafy Vegetables	Kale	KALE,RAW	Fresh	1 cup	67	56.5882	33.5	2.211	0.469	6.7067	0	0.06097	0
Dark Green Leafy Vegetables	Romaine & Leaf Lettuce	LETTUCE,GRN LEAF,ROMAINE,RAW	Fresh	1 cup	41.5	39.3399	6.64	0.537425	0.093375	1.2782	0.408775	0.0122425	0
Dark Green Leafy Vegetables	Mustard Greens	MUSTARD GREENS,RAW	Fresh	1 cup	56	50.848	14.56	1.512	0.112	2.744	0.896	0.0056	0
Dark Green Leafy Vegetables	Spinach	SPINACH,RAW	Fresh	1 cup	30	27.42	6.9	0.858	0.117	1.089	0.126	0.0189	0
Dark Green Leafy Vegetables	Spinach	SPINACH,FRZ,CHOPD OR LEAF,UNPREP	Frozen	1 cup	156	140.665	45.24	5.6628	0.8892	6.5676	1.014	0.06396	0
Dark Green Leafy Vegetables	Turnip greens	TURNIP GREENS,RAW	Fresh	1 cup	55	49.3185	17.6	0.825	0.165	3.9215	0.4455	0.0385	0
Dark Green Leafy Vegetables -- User Defined
Red and Orange Vegetables	Carrots	CARROTS,RAW	Fresh	1 cup	128	113.011	52.48	1.1904	0.3072	12.2624	6.0672	0.04736	0
Red and Orange Vegetables	Carrots	CARROTS,CND,REG PK,DRND SOL	Canned	1 cup	228	211.926	57	1.4592	0.4332	12.6312	5.6544	0.08208	0
Red and Orange Vegetables	Carrots	CARROTS,FRZ,CKD,BLD,DRND,WO/SALT	Frozen	1 cup	146	131.867	54.02	0.8468	0.9928	11.2858	5.9568	0.1752	0
Red and Orange Vegetables	Pumpkin	PUMPKIN,RAW	Fresh	1 cup	116	106.256	30.16	1.16	0.116	7.54	1.5776	0.06032	0
Red and Orange Vegetables	Winter Squash	SQUASH,WINTER,ACORN & BUTTERNUT,RAW	Fresh	1 cup	140	121.933	59.5	1.26	0.14	15.477	3.08	0.0294	0
Red and Orange Vegetables	Sweet Potatoes	SWEET POTATO,RAW,UNPREP	Fresh	1 cup	133	102.782	114.38	2.0881	0.0665	26.7596	5.5594	0.02394	0
Red and Orange Vegetables	Tomatoes	TOMATOES,RED,RIPE,RAW,YEAR RND AVERAGE	Fresh	1 cup	149	140.835	26.82	1.3112	0.298	5.7961	3.9187	0.04172	0
Red and Orange Vegetables	Tomatoes	TOMATOES,RED,RIPE,CND,STWD	Canned	1 cup	255	233.427	66.3	2.3205	0.4845	15.7845	8.976	0.0663	0
Orange Vegetables -- User Defined
Dry Bean & Peas	Dry edible beans	average of beans used by Linda Scott Kantor of the USDA	Cooked	1 cup	174.4	115.4	228.987	14.0863	1.2208	41.7636	3.47347	0.230382	0
Dry Bean & Peas	Dry peas and lentils	average of peas and lentils used by Linda Scott Kantor of the USDA	Cooked	1 cup	197	137.043	230.49	17.0996	0.75845	40.6116	4.6295	0.105395	0
Starchy Vegetables	Green Peas	PEAS,GREEN,RAW	Canned	1 cup	145	114.347	73.71	4.9322	0.364	13.1495	5.1597	0.06461	0
Starchy Vegetables	Green Peas	PEAS,GRN,FRZ,UNPREP	Frozen	1 cup	134	107.173	70.07	4.7502	0.364	12.3942	4.55	0.06006	0
Starchy Vegetables	Lima beans	LIMA BNS,LRG,MATURE SEEDS,CKD,BLD,WO/SALT	Fresh	1 cup	188	131.205	216.2	14.664	0.7144	39.2544	5.452	0.16732	0
Starchy Vegetables	Lima beans	LIMA BNS,IMMAT SEEDS,FRZ,FORDHOOK,UNPREP	Frozen	1 cup	160	115.28	169.6	10.24	0.56	31.728	2.224	0.1296	0
Starchy Vegetables	Potatoes	POTATO,FLESH & SKN,RAW	Fresh	1 cup	213	168.994	164.01	4.3026	0.1917	37.2111	1.6614	0.05538	0
Starchy Vegetables	Potatoes	POTATOES,CND,DRND SOL	Canned	1 cup	180	151.704	108	2.538	0.378	24.498	1.062	0.0972	0
Starchy Vegetables	Potatoes	POTATOES,FRZ,WHL,UNPREP	Frozen	1 cup	182	144.326	141.96	4.3316	0.2912	31.7954	1.4196	0.07462	0
Starchy Vegetables	Potatoes	POTATOES,MSHD,DEHYD,FLAKES WO/MILK,DRY FORM	DeHydrated	1 cup	60	3.948	212.4	5.004	0.246	48.702	2.016	0.1014	0
Starchy Vegetables	Sweet Corn	CORN,SWEET,WHITE,RAW	Fresh	1 cup	120	91.152	103.2	3.864	1.416	22.824	3.864	0.2184	0
Starchy Vegetables	Sweet Corn	CORN,SWT,WHITE,CND,WHL KERNEL,DRND SOL	Canned	1 cup	164	126.149	132.84	4.2968	1.64	30.4876	3.936	0.25256	0
Starchy Vegetables	Sweet Corn	CORN,SWT,WHITE,FRZ,KRNLS CUT OFF COB,UNPREP	Frozen	1 cup	165	123.618	145.2	4.983	1.2705	34.3365	5.148	0.19635	0
Starchy Vegetables -- User Defined
Other Vegetables	Artichokes	ARTICHOKES,(GLOBE OR FRENCH),RAW	Fresh	1 cup	196.923	118.916	92.5538	6.43938	0.295385	20.6966	1.94954	0.0708923	0
Other Vegetables	Asparagus	ASPARAGUS,RAW	Fresh	1 cup	134	124.915	26.8	2.948	0.1608	5.1992	2.5192	0.0536	0
Other Vegetables	Asparagus	ASPARAGUS,CND,DRND SOL	Canned	1 cup	242	227.432	45.98	5.1788	1.573	5.9532	2.5652	0.35574	0
Other Vegetables	Asparagus	ASPARAGUS,FRZ,CKD,BLD,DRND,WO/SALT	Frozen	1 cup	180	169.38	32.4	5.31	0.756	3.456	0.576	0.1728	0
Other Vegetables	Bell peppers	PEPPERS,SWT,GRN,RAW	Fresh	1 cup	149	139.896	29.8	1.2814	0.2533	6.9136	3.576	0.08642	0
Other Vegetables	Brussels sprouts	BRUSSELS SPROUTS,RAW	Fresh	1 cup	88	75.68	37.84	2.9744	0.264	7.876	1.936	0.05456	0
Other Vegetables	Cabbage	CABBAGE,RAW	Fresh	1 cup	89	82.0402	22.25	1.1392	0.089	5.162	2.848	0.03026	0
Other Vegetables	Cabbage	CABBAGE,CKD,BLD,DRND,WO/SALT	Canned	1 cup	150	69.4275	34.5	1.905	0.09	8.265	4.185	0	0
Other Vegetables	Cauliflower	CAULIFLOWER,RAW	Fresh	1 cup	107	98.5149	26.75	2.0544	0.2996	5.3179	2.0437	0.06848	0
Other Vegetables	Cauliflower	CAULIFLOWER,FRZ,CKD,BLD,DRND,WO/SALT	Frozen	1 cup	180	169.2	34.2	2.898	0.396	6.75	1.89	0.0612	0
Other Vegetables	Celery	CELERY,RAW	Fresh	1 cup	101	96.3843	16.16	0.6969	0.1717	2.9997	1.8483	0.04242	0
Other Vegetables	Chilly Peppers	PEPPERS,HOT CHILI,GRN,CND,PODS,EXCLUDING SEEDS,SOL&LIQUIDS	Canned	1 cup	136	62.9	28.56	1.224	0.136	6.936	4.2432	0.0136	0
Other Vegetables	Cucumbers	CUCUMBER,WITH PEEL,RAW	Fresh	1 cup	52	49.5196	15.6	0.676	0.1144	3.7752	1.7368	0.03848	0
Other Vegetables	Cucumbers	PICKLES,CUCUMBER,DILL OR KOSHER DILL	Canned	1 cup	143	134.892	17.16	0.858	0.2002	3.7037	1.8733	0.05148	0
Other Vegetables	Eggplant	EGGPLANT,RAW	Fresh	1 cup	82	75.7762	19.68	0.8282	0.1558	4.674	1.927	0.02788	0
Other Vegetables	Garlic	GARLIC,RAW	Fresh	1 cup	136	79.6688	202.64	8.6496	0.68	44.9616	1.36	0.12104	0
Other Vegetables	Head lettuce	LETTUCE,ICEBERG (INCL CRISPHEAD TYPES),RAW	Fresh	1 cup	72	68.8608	10.08	0.648	0.1008	2.1384	1.4184	0.01296	0
Other Vegetables	Mushrooms	MUSHROOMS,WHITE,RAW	Fresh	1 cup	70	64.715	15.4	2.163	0.238	2.282	1.386	0.035	0
Other Vegetables	Mushrooms	MUSHROOMS,CND,DRND SOL	Canned	1 cup	156	142.085	39	2.9172	0.4524	7.9404	3.6504	0.05928	0
Other Vegetables	Okra	OKRA,RAW	Fresh	1 cup	100	90.17	31	2	0.1	7.03	1.2	0.026	0
Other Vegetables	Onions	ONIONS,RAW	Fresh	1 cup	160	142.576	64	1.76	0.16	14.944	6.784	0.0672	0
Other Vegetables	Onions	ONIONS,DEHYDRATED FLAKES	Dehydrated	1 cup	56	0.5502	195.44	5.012	0.2576	46.6368	20.9496	0.04368	0
Other Vegetables	Radishes	RADISHES,RAW	Fresh	1 cup	116	110.513	18.56	0.7888	0.116	3.944	2.1576	0.03712	0
Other Vegetables	Snap beans	BEANS,SNAP,GREEN,RAW	Fresh	1 cup	100	90.32	31	1.83	0.22	6.97	3.26	0.05	0
Other Vegetables	Snap beans	BEANS,SNAP,GRN,CND,REG PK,DRND SOL	Canned	1 cup	153	142.734	35.19	1.8054	0.1683	6.7473	1.1934	0.03825	0
Other Vegetables	Snap beans	BEANS,SNAP,GRN,FRZ,ALL STYLES,UNPREP	Frozen	1 cup	121	108.815	47.19	2.1659	0.2541	9.1234	2.6741	0.05687	0
Other Vegetables	Summer Squa	SQUASH,SMMR,ZUCCHINI,INCL SKN,RAW	Fresh	1 cup	124	117.54	21.08	1.5004	0.3968	3.8564	3.1	0.10416	0
Other Vegetables -- User Defined
Citrus	Orange	ORANGES,RAW,ALL COMM VAR	Fresh	1 cup	180	156.15	84.6	1.692	0.216	21.15	16.83	0.027	0
Citrus	Orange	ORANGE JUICE,RAW	Juice	1 cup	248	218.984	111.6	1.736	0.496	25.792	20.832	0.05952	0
Citrus	Grapefruit	GRAPEFRUIT,RAW,PINK&RED&WHITE,ALL AREAS	Fresh	1 cup	230	209.047	73.6	1.449	0.23	18.584	16.054	0.0322	0
Citrus	Grapefruit	GRAPEFRUIT JUC,WHITE,RAW	Juice	1 cup	247	222.3	96.33	1.235	0.247	22.724	22.477	0.03458	0
Citrus	Lemons	LEMONS,RAW,WITHOUT PEEL	Fresh	1 cup	212	188.638	61.48	2.332	0.636	19.7584	5.3	0.08268	0
Citrus	Lemons	LEMON JUICE,RAW	Juice	1 cup	244	225.236	53.68	0.854	0.5856	16.836	6.1488	0.0976	0
Citrus	Limes	LIMES,RAW	Fresh	1 cup	204.25	180.271	61.275	1.42975	0.4085	21.5279	3.45182	0.044935	0
Citrus	Limes	LIME JUICE,RAW	Juice	1 cup	242	219.712	60.5	1.0164	0.1694	20.3764	4.0898	0.01936	0
Citrus	Tangerines	TANGERINES,(MANDARIN ORANGES),RAW	Fresh	1 cup	195	166.082	103.35	1.5795	0.6045	26.013	20.631	0.07605	0
Citrus -- User Defined
Non-Citrus	Apples	APPLES,RAW,WITH SKIN	Fresh	1 cup	125	106.95	65	0.325	0.2125	17.2625	12.9875	0.035	0
Non-Citrus	Apples & Applesauce	APPLESAUCE,CND,UNSWTND,WO/ADDED VIT C (INCLUDES USDA COMMOD)	Canned	1 cup	244	215.257	102.48	0.4148	0.244	27.4988	22.9116	0.01952	0
Non-Citrus	Apples	APPLES,FRZ,UNSWTND,UNHTD	Frozen	1 cup	173	150.25	83.04	0.4844	0.5536	21.2963	0	0.09169	0
Non-Citrus	Apples	APPLES,DEHYD (LO MOIST),SULFURED,UNCKD	Dried	1 cup	86	2.58	208.98	0.7998	0.2752	56.6654	49.1834	0.04472	0
Non-Citrus	Apples	APPLE JUC,CND OR BTLD,UNSWTND,WO/ ADDED VIT C	Juice	1 cup	248	218.835	114.08	0.248	0.3224	28.024	23.8576	0.05456	0
Non-Citrus	Apricots	APRICOTS,RAW	Fresh	1 cup	155	133.843	74.4	2.17	0.6045	17.236	14.322	0.04185	0
Non-Citrus	Apricots	APRICOTS,CND,H2O PK,W/SKN,SOL&LIQUIDS	Canned	1 cup	243	224.435	65.61	1.7253	0.3888	15.5277	11.6397	0.02673	0
Non-Citrus	Apricots	Frozen, unsweetened sour cherries used as a proxy1	Frozen	1 cup	155	135.16	71.3	1.426	0.682	17.081	13.981	0.155	0
Non-Citrus	Apricots	APRICOTS,DRIED,SULFURED,UNCKD	Dried	1 cup	130	40.157	313.3	4.407	0.663	81.432	69.472	0.0221	0
Non-Citrus	Avocados	AVOCADOS,RAW,ALL COMM VAR	Fresh	1 cup	150	109.845	240	3	21.99	12.795	0.99	3.189	0
Non-Citrus	Bananas	BANANAS,RAW	Fresh	1 cup	225	168.548	200.25	2.4525	0.7425	51.39	27.5175	0.252	0
Non-Citrus	Blackberries	BLACKBERRIES,RAW	Frozen	1 cup	144	126.936	61.92	2.0016	0.7056	13.8384	7.0272	0.02016	0
Non-Citrus	Blueberries	BLUEBERRIES,RAW	Fresh	1 cup	148	124.631	84.36	1.0952	0.4884	21.4452	14.7408	0.04144	0
Non-Citrus	Blueberries	BLUEBERRIES,FRZ,UNSWTND	Frozen	1 cup	155	134.215	79.05	0.651	0.992	18.8635	13.0975	0.08215	0
Non-Citrus	Cantaloup	MELONS,CANTALOUPE,RAW	Fresh	1 cup	177	159.566	60.18	1.4868	0.3363	14.4432	13.9122	0.09027	0
Non-Citrus	Cherries	CHERRIES,SWEET,RAW	Fresh	1 cup	138	113.505	86.94	1.4628	0.276	22.0938	17.6916	0.05244	0
Non-Citrus	Cherries	CHERRIES,SWT,CND,H2O PK,SOL&LIQUIDS	Canned	1 cup	248	215.884	114.08	1.9096	0.3224	29.1648	25.4448	0.06944	0
Non-Citrus	Cherries	CHERRIES,SOUR,RED,FRZ,UNSWTND	Frozen	1 cup	155	135.16	71.3	1.426	0.682	17.081	13.981	0.155	0
Non-Citrus	Cranberries	CRANBERRIES,RAW	Fresh	1 cup	110	95.843	50.6	0.429	0.143	13.42	4.444	0.0121	0
Non-Citrus	Cranberries	CRANBERRY JUC,UNSWTND	Juice	1 cup	253	220.439	116.38	0.9867	0.3289	30.866	30.613	0.0253	0
Non-Citrus	Dates	DATES,DEGLET NOOR	Dried	1 cup	147	30.1791	414.54	3.6015	0.5733	110.294	93.1245	0.04704	0
Non-Citrus	Figs	FIGS,RAW	Dried	1 cup	149	117.874	371.01	4.917	1.3857	95.1663	71.4008	0.21456	0
Non-Citrus	Grapes	GRAPES,AMERICAN TYPE (SLIP SKN),RAW	Fresh	1 cup	92	74.796	61.64	0.5796	0.322	15.778	14.95	0.10488	0
Non-Citrus	Grapes	GRAPE JUC,CND OR BTLD,UNSWTND,WO/ ADDED VIT C	Juice	1 cup	253	213.81	151.8	0.9361	0.3289	37.3681	35.926	0.06325	0
Non-Citrus	Honeydew melons	MELONS,HONEYDEW,RAW	Fresh	1 cup	177	158.981	63.72	0.9558	0.2478	16.0893	14.3724	0.06726	0
Non-Citrus	Kiwifruit	KIWIFRUIT,GRN,RAW	Fresh	1 cup	180	149.526	109.8	2.052	0.936	26.388	16.182	0.0522	0
Non-Citrus	Mangoes	MANGOS,RAW	Fresh	1 cup	165	137.709	99	1.353	0.627	24.717	22.539	0.1518	0
Non-Citrus	Olives	OLIVES,RIPE,CND (SMALL-EXTRA LRG)	Canned	1 cup	144	115.186	165.6	1.2096	15.3792	9.0144	0	2.0376	0
Non-Citrus	Peaches	PEACHES,RAW	Fresh	1 cup	154	136.86	60.06	1.4014	0.385	14.6916	12.9206	0.02926	0
Non-Citrus	Peaches	PEACHES,CND,H2O PK,SOL&LIQUIDS	Canned	1 cup	244	227.237	58.56	1.0736	0.1464	14.9084	11.7364	0.01464	0
Non-Citrus	Peaches	Frozen, unsweetened sour cherries used as a proxy1	Frozen	1 cup	155	135.16	71.3	1.426	0.682	17.081	13.981	0.155	0
Non-Citrus	Peaches	PEACHES,DRIED,SULFURED,UNCKD	Dried	1 cup	160	50.88	382.4	5.776	1.216	98.128	66.784	0.1312	0
Non-Citrus	Pears	PEARS,RAW	Fresh	1 cup	125	104.638	72.5	0.475	0.15	19.325	12.25	0.0075	0
Non-Citrus	Pears	PEARS,CND,H2O PK,SOL&LIQUIDS	Canned	1 cup	244	224.016	70.76	0.4636	0.0732	19.0564	14.884	0.00488	0
Non-Citrus	Pears	PEARS,DRIED,SULFURED,UNCKD	Dried	1 cup	180	48.042	471.6	3.366	1.134	125.46	111.96	0.063	0
Non-Citrus	Pineapple	PINEAPPLE,RAW,ALL VAR	Fresh	1 cup	165	141.9	82.5	0.891	0.198	21.648	16.2525	0.01485	0
Non-Citrus	Pineapple	PINEAPPLE,CND,H2O PK,SOL&LIQUIDS	Canned	1 cup	246	223.417	78.72	1.0578	0.2214	20.418	18.45	0.01476	0
Non-Citrus	Pineapple	PINEAPPLE JUC,CND,UNSWTND,WO/ VIT C	Juice	1 cup	250	215.925	132.5	0.9	0.3	32.175	24.95	0.02	0
Non-Citrus	Papayas	PAPAYAS,RAW	Fresh	1 cup	145	127.687	62.35	0.6815	0.377	15.689	11.339	0.11745	0
Non-Citrus	Plums	PLUMS,RAW	Fresh	1 cup	165	143.93	75.9	1.155	0.462	18.843	16.368	0.02805	0
Non-Citrus	Plums	PLUMS,CND,PURPLE,H2O PK,SOL&LIQUIDS	Canned	1 cup	249	219.991	102.09	0.9711	0.0249	27.4647	25.149	0.00249	0
Non-Citrus	Plums & Prunes	Frozen, unsweetened sour cherries used as a proxy1	Frozen	1 cup	155	135.16	71.3	1.426	0.682	17.081	13.981	0.155	0
Non-Citrus	Plums	PLUMS,DRIED (PRUNES),UNCKD	Dried	1 cup	174	53.8008	417.6	3.7932	0.6612	111.151	66.3462	0.15312	0
Non-Citrus	Prunes	PRUNE JUICE,CANNED	Juice	1 cup	256	207.974	181.76	1.5616	0.0768	44.672	42.112	0.00768	0
Non-Citrus	Raisins	RAISINS,SEEDLESS	Dried	1 cup	165	25.4595	493.35	5.0655	0.759	130.647	97.6635	0.0957	0
Non-Citrus	Raspberry	RASPBERRIES,RAW	Fresh	1 cup	123	105.472	63.96	1.476	0.7995	14.6862	5.4366	0.02337	0
Non-Citrus	Raspberry	Raw raspberries used as a proxy2	Frozen	1 cup	123	105.472	63.96	1.476	0.7995	14.6862	5.4366	0.02337	0
Non-Citrus	Strawberries	STRAWBERRIES,RAW	Fresh	1 cup	152	138.244	48.64	1.0184	0.456	11.6736	7.4328	0.0228	0
Non-Citrus	Strawberries	STRAWBERRIES,FRZ,UNSWTND	Frozen	1 cup	221	198.834	77.35	0.9503	0.2431	20.1773	10.0776	0.01326	0
Non-Citrus	Watermelon	WATERMELON,RAW	Fresh	1 cup	154	140.833	46.2	0.9394	0.231	11.627	9.548	0.02464	0
Non-Citrus -- User Defined
Dairy	beverage milk	MILK,WHL,3.25% MILKFAT,W/ ADDED VITAMIN D	plain whole	1 cup	244	215.037	148.84	7.686	7.93	11.712	12.322	4.5506	24.4
Dairy	beverage milk	MILK,RED FAT,FLUID,2% MILKFAT,W/ ADDED VIT A & VITAMIN D	plain 2 percent	1 cup	244	217.672	122	8.052	4.8312	11.712	12.3464	3.06708	19.52
Dairy	beverage milk	MILK,LOWFAT,FLUID,1% MILKFAT,W/ ADDED VIT A & VITAMIN D	plain 1 percent	1 cup	244	219.405	102.48	8.2228	2.3668	12.1756	12.688	1.54452	12.2
Dairy	beverage milk	MILK,NONFAT,FLUID,W/ ADDED VIT A & VIT D (FAT FREE OR SKIM)	plain skim	1 cup	245	222.558	83.3	8.2565	0.196	12.152	12.4705	0.1372	4.9
Dairy	beverage milk	MILK,CHOC,FLUID,COMM,WHL,W/ ADDED VIT A & VITAMIN D	flavored whole	1 cup	250	205.75	207.5	7.925	8.475	25.85	23.85	5.26	30
Dairy	beverage milk	MILK,CHOC,FLUID,COMM,RED FAT,W/ ADDED VIT A & VITAMIN D	flavored lower fat	1 cup	250	205.425	190	7.475	4.75	30.325	23.875	2.9425	20
Dairy	yogurt	YOGURT,PLN,LOFAT,12 GRAMS PROT PER 8 OZ	yogurt	1 cup	245	208.422	154.35	12.8625	3.7975	17.248	17.248	2.45	14.7
Dairy	American	CHEESE,CHEDDAR	cheddar	1.5 oz	42.525	15.6279	171.376	10.5887	14.0928	0.54432	0.22113	8.96937	44.6513
Dairy	Italian	CHEESE,PROVOLONE	Provolone	1.5 oz	42.525	17.414	149.263	10.8779	11.3202	0.910035	0.23814	7.26242	29.3423
Dairy	Italian	CHEESE,ROMANO	Romano	1.5 oz	42.525	13.1445	164.572	13.523	11.4562	1.54366	0.310433	7.27815	44.226
Dairy	Italian	CHEESE,PARMESAN,GRATED	Parmesean	1.5 oz	42.525	8.86221	183.283	16.3551	12.1664	1.72652	0.382725	7.35725	37.422
Dairy	Italian	CHEESE,MOZZARELLA,WHL MILK	Mozzarella	1.5 oz	42.525	21.2668	127.575	9.42779	9.50434	0.931298	0.438008	5.59289	33.5948
Dairy	Italian	CHEESE,RICOTTA,WHOLE MILK	Ricotta	1/2 cup	123	88.191	214.02	13.8498	15.9654	3.7392	0.3321	10.2028	62.73
Dairy	Misc. Cheese	CHEESE,SWISS	Swiss	1.5 oz	42.525	15.7853	161.595	11.452	11.822	2.28785	0.56133	7.56052	39.123
Dairy	Misc. Cheese	CHEESE,BRICK	Brick	1.5 oz	42.525	17.482	157.768	9.88281	12.6214	1.18645	0.216878	7.97939	39.9735
Dairy	Misc. Cheese	CHEESE,MUENSTER	Muenster	1.5 oz	42.525	17.7627	156.492	9.9551	12.7745	0.47628	0.47628	8.1278	40.824
Dairy	Misc. Cheese	CHEESE,BLUE	Blue	1.5 oz	42.525	18.0349	150.113	9.10035	12.2217	0.995085	0.212625	7.93899	31.8938
Dairy	Misc. Cheese	Average of the four, named miscellaneous cheeses	other	1.5 oz	42.525	17.2662	156.492	10.0976	12.3599	1.23641	0.366778	7.90168	37.9536
Dairy	cottage cheese	CHEESE,COTTAGE,CRMD,LRG OR SML CURD	regular	2 cups	420	335.118	411.6	46.704	18.06	14.196	11.214	7.2156	71.4
Dairy	cottage cheese	CHEESE,COTTAGE,LOWFAT,2% MILKFAT	lowfat	2 cups	452	364.719	388.72	53.4716	11.074	16.5432	16.5884	4.42508	45.2
Dairy	frozen dairy	ICE CREAMS,VANILLA	ice cream	1.5 cups	198	120.78	409.86	6.93	21.78	46.728	42.0156	13.4442	87.12
Dairy	frozen dairy	ICE CREAMS,VANILLA,LT,SOFT-SERVE	lowfat ice cream	1.5 cups	264	183.744	332.64	12.936	6.864	57.552	49.3416	4.3032	31.68
Dairy	frozen dairy	Average of the two types of frozen dairy desserts	other	1.5 cups	231	152.262	371.25	9.933	14.322	52.14	45.6786	8.8737	59.4
Dairy	evaporated and condensed milk	MILK,CND,EVAP,W/ ADDED VITAMIN D & WO/ ADDED VIT A	canned whole	1/2 cup	126	93.2904	168.84	8.5806	9.5256	12.6504	12.6504	5.78466	36.54
Dairy	evaporated and condensed milk	MILK,CND,EVAP,W/ ADDED VITAMIN D & WO/ ADDED VIT A	bulk whole	1/2 cup	126	93.2904	168.84	8.5806	9.5256	12.6504	12.6504	5.78466	36.54
Dairy	evaporated and condensed milk	MILK,CND,EVAP,NONFAT,W/ ADDED VIT A & VITAMIN D	skim	1/2 cup	128	101.632	99.84	9.664	0.256	14.528	14.528	0.15488	5.12
Dairy	dry milk	MILK,DRY,WHL,W/ ADDED VITAMIN D	whole	1/4 cup	32	0.7904	158.72	8.4224	8.5472	12.2944	12.2944	5.35744	31.04
Dairy	dry milk	MILK,DRY,NONFAT,INST,W/ ADDED VIT A & VITAMIN D	nonfat	1/4 cup	17	0.6732	60.86	5.967	0.1224	8.8723	8.8723	0.07939	3.06
Dairy	dry milk	MILK,BUTTERMILK,DRIED	buttermilk	1/4 cup	30	0.891	116.1	10.29	1.734	14.7	14.7	1.0794	20.7
Dairy Substitute - Vegan Option	Soymilk	Soymilk, original and vanilla, with added calcium, vitamins A and D3		1 cup	243	219.57	104	6.32	3.57	11.96	8.87	0.498	0
Meat Substitute - Vegan Option	Tofu	Tofu, firm, prepared with calcium sulfate and magnesium chloride (nigari) #16126 4		1/4 cup cooked	63	53.52	44	5.16	2.63	1.06	0.38	0.544	0
Protein rich foods	Dry edible beans	average of beans used by Linda Scott Kantor of the USDA	Cooked from dry	1/4 cup cooked	43.6	28.8501	57.2468	3.52157	0.3052	10.4409	0.868367	0.0575956	0
Protein rich foods	Dry peas and lentils	average of peas and lentils used by Linda Scott Kantor of the USDA	Cooked from dry	1/4 cup cooked	49.25	34.2608	57.6225	4.2749	0.189612	10.1529	1.15738	0.0263488	0
Protein rich foods	beef	BEEF,COMP OF RTL CUTS,LN&FAT,1/8"FAT,ALL GRDS,CKD	cooked	1 oz cooked	28.3495	14.96	82.497	7.48994	5.58769	0	0	2.20276	24.6641
Protein rich foods	veal	Veal, composite of trimmed retail cuts, separable lean and fat, cooked	cooked	1 oz cooked	28.3495	16.1819	65.4873	8.5332	3.22901	0	0	1.24738	32.3184
Protein rich foods	pork	pork, average all cuts & bacon5	cooked	1 oz cooked	28.3495	14.0229	84.3241	8.06693	5.48893	0.0795338	0	1.87914	26.1712
Protein rich foods	lamb	LAMB,DOM,COMP OF RTL CUTS,LN&FAT,1/4"FAT,CHOIC,CKD	cooked	1 oz cooked	28.3495	15.2294	83.3475	6.9513	5.93639	0	0	2.50326	27.499
Protein rich foods	chicken	Chicken, broilers or fryers, meat and skin, cooked, roasted	cooked	1 oz roasted	28.3495	16.8538	67.7553	7.73941	3.85553	0	0	1.07445	24.9476
Protein rich foods	turkey	TURKEY,ALL CLASSES,MEAT&SKN&GIBLETS&NECK,CKD,RSTD	cooked	1 oz roasted	28.3495	17.5767	58.1165	7.93219	2.67903	0.0198447	0	0.785281	26.932
Protein rich foods	fish and shellfish	Average of salmon, sardine, tuna, and shrimp6	all preparations	1 oz., cooked	28.3495	19.1351	44.5631	6.70846	1.82398	0	0	0.272364	35.8228
Protein rich foods	salmon	Fish, salmon, pink, canned, drained solids with bone	canned	1 oz., cooked	28.3495	19.9921	38.5553	6.54306	1.36928	0	0	0.240404	23.2466
Protein rich foods	sardines	SARDINE,ATLANTIC,CND IN OIL,DRND SOL W/BONE	drained solids	1 oz., cooked	28.3495	16.8991	58.967	6.97965	3.24602	0	0	0.43318	40.2563
Protein rich foods	tuna	TUNA,WHITE,CND IN OIL,DRND SOL	drained solids	1 oz., cooked	28.3495	18.1493	52.7301	7.52112	2.29064	0	0	0.362874	8.78834
Protein rich foods	shellfish	Crustaceans, shrimp, mixed species, canned7	canned	1 oz., cooked	28.3495	21.5	28	5.79	0.39	0	0	0.053	71
Protein rich foods	other	Average of salmon, sardine, tuna, and shrimp6	canned	1 oz., cooked	28.3495	19.1351	44.5631	6.70846	1.82398	0	0	0.272364	35.8228
Protein rich foods	cured	COD,ATLANTIC,DRIED&SALTED	dried and salted	1 oz., dried	28.3495	4.57561	82.2135	17.8092	0.671883	0	0	0.130975	43.0912
Protein rich foods	eggs	EGG,WHL,RAW,FRSH	raw	1 large raw egg	56.699	43.1763	81.0796	7.12139	5.39207	0.408233	0.209786	1.77241	210.92
Protein rich foods	peanuts	PEANUTS,ALL TYPES,RAW	raw	1/2 oz.	14.1747	0.921359	80.3708	3.65709	6.97965	2.28639	0.562738	0.968702	0
Protein rich foods	coconuts	COCONUT MEAT,DRIED (DESICCATED),NOT SWTND	raw	1/2 oz.	14.1747	0.425242	93.5533	0.975223	9.14697	3.35233	1.04184	8.11051	0
Protein rich foods	almonds	ALMONDS	raw	1/2 oz.	14.1747	0.666213	81.5048	3.00788	7.00516	3.07167	0.551398	0.52886	0
Protein rich foods	hazelnuts	HAZELNUTS OR FILBERTS	raw	1/2 oz.	14.1747	0.752679	89.0174	2.11913	8.61116	2.36718	0.615184	0.632761	0
Protein rich foods	pecans	PECANS	raw	1/2 oz.	14.1747	0.498951	97.9475	1.29982	10.2016	1.96462	0.562738	0.876	0
Protein rich foods	walnuts	WALNUTS,ENGLISH	raw	1/2 oz.	14.1747	0.576912	92.7029	2.15881	9.24335	1.94336	0.369961	0.868345	0
Protein rich foods	macadamia nuts	MACADAMIA NUTS,RAW	raw	1/2 oz.	14.1747	0.192777	101.775	1.12122	10.7402	1.95895	0.647786	1.70962	0
Protein rich foods	pistachios	PISTACHIO NUTS,RAW	raw	1/2 oz.	14.1747	0.554233	79.6621	2.87322	6.43392	3.89947	1.08579	0.787549	0
Protein rich foods	other nuts	Average of other nuts8	raw	1/2 oz.	14.1748	0.573546	89.5667	2.15155	8.54525	2.6055	0.679679	1.81029	0
Protein rich foods -- User Defined
Added fats	butter	BUTTER,WITH SALT	n/a	1 gram	1	0.1587	7.17	0.0085	0.8111	0.0006	0.0006	0.51368	2.15
Added fats	margarine	MARGARINE,REG,80% FAT,COMP,STK,W/ SALT	n/a	1 gram	1	0.1652	7.17	0.0016	0.8071	0.007	0	0.15189	0
Added fats	lard	LARD	n/a	1 gram	1	0	9.02	0	1	0	0	0.392	0.95
Added fats	edible beef tallow	FAT,BEEF TALLOW	n/a	1 gram	1	0	9.02	0	1	0	0	0.498	1.09
Added fats	shortening	SHORTENING,HOUSEHOLD,LARD&VEG OIL	n/a	1 gram	1	0	9	0	1	0	0	0.403	0.56
Added fats	salad and cooking oils	OIL,CORN AND CANOLA	n/a	1 gram	1	0	8.84	0	1	0	0	0.08026	0
Added fats	other edible fats and oils	OIL,CORN,PEANUT,AND OLIVE	n/a	1 gram	1	0	8.84	0	1	0	0	0.14367	0
Added fats	light cream	CREAM,FLUID,LT (COFFEE CRM OR TABLE CRM)	n/a	1 gram	1	0.7375	1.95	0.027	0.1931	0.0366	0.0014	0.1202	0.66
Added fats	half and half	CREAM,FLUID,HALF AND HALF	n/a	1 gram	1	0.8057	1.3	0.0296	0.115	0.043	0.0016	0.07158	0.37
Added fats	heavy cream	CREAM,FLUID,HVY WHIPPING	n/a	1 gram	1	0.5771	3.45	0.0205	0.37	0.0279	0.0011	0.23032	1.37
Added fats	sour cream	SOUR CREAM,REDUCED FAT	n/a	1 gram	1	0.71	1.81	0.07	0.141	0.07	0.003	0.087	0.35
Added fats	cream cheese	CHEESE,CREAM	n/a	1 gram	1	0.5444	3.42	0.0593	0.3424	0.0407	0.0321	0.19292	1.1
Added fats	eggnog	EGGNOG	n/a	1 gram	1	0.8254	0.88	0.0455	0.0419	0.0805	0.0841	0.02591	0.59
Added fats -- User Defined
Sweeteners	Refined Cane & Beet Sugar	SUGAR,TURBINADO, BROWN & GRANULATED	n/a	tsp	4.2	0.01946	16.324	0.00168	0	4.17018	4.14414	0	0
Sweeteners	HFCS	SYRUPS,CORN,HIGH-FRUCTOSE	n/a	tsp	6.33333	1.52	17.7967	0	0	4.81333	1.66947	0	0
Sweeteners	Glucose	No entry in Nutrient Database for Standard Reference. Assumed identical to sugar.	n/a	tsp	4.2	0.01946	16.324	0.00168	0	4.17018	4.14414	0	0
Sweeteners	Dextrose	No entry in Nutrient Database for Standard Reference. Assumed identical to sugar.	n/a	tsp	4.2	0.01946	16.324	0.00168	0	4.17018	4.14414	0	0
Sweeteners	Edible syrups	SYRUPS,MAPLE & SYRUPS, TABLE BLENDS,CANE & 15% MAPLE & SYRUPS,TABLE BLENDS,CORN,REFINER,&SUGAR	n/a	tsp	6.66667	1.74667	19.0444	0.000888889	0.00355556	4.89911	4.288	0.0006	0
Sweeteners	Honey	HONEY	n/a	tsp	7	1.197	21.28	0.021	0	5.768	5.7484	0	0
Sweeteners -- User Defined
NOTES
1 - Frozen, unsweetened sour cherries were used as a proxy for the nutrient content of frozen apricots, peaches, and plums. Only sweetened versions of these products were available in the USDA Nutrient Database for Standard Reference, and the nutrient profiles of these products have a much higher energy density than would the frozen fruit alone. Sour cherries were used as a substitute because the…
2 - Raw raspberries were used as a proxy for frozen raspberries. Only a sweetened version of the frozen product was available in the USDA Nutrient Database for Standard Reference.
3 - Source: National Nutrient Database for Standard Reference, Release 24 (March 30, 2012), accessed Sept. 19, 2012
4 - Source: National Nutrient Database for Standard Reference, Release 25, accessed Nov. 1, 2012; Note from USDA -> ¼ cup (about 2 ounces) of tofu = 1 meat. Oz. equivalent (http://www.choosemyplate.gov/food-groups/proteinfoods_counts_table.html)
5 - The composite of retail pork cuts reported in the Nutrient Database for Standard Reference excludes pork bellies (generally used for bacon). Since pork bellies constitute a substantial fraction of the edible portion of a hog, an aggregate nutrient composition was calculated. Values shown are a weighted average. According to calculations made from Table 13 of USDA Agricultural Hanbook 697, por…
6 - The USDA-ERS does not report the individual species represented in fresh fish and shellfish. Nutrient profile of this category of foods was estimated using the average of canned salmon, sardines, tuna, and shrimp.
7 - Shrimp are the most commonly consumed type of shellfish and were thus used to represent this category. Data from Nutrient Database for Standard Reference, Release 26. Accessed on July 15, 2014.
8 - In the food supply data, "Other nuts" includes Brazil nuts, pignolias, chestnuts, cashews, and mixed nuts. The nutrient profile is represented by an average of all individual nuts included in the model.

## Sheet: Losses and waste
LOSSES AND WASTE
This worksheet contains estimates of losses that occur from the production of primary food commodities to the retail level, from the retail/institutional level to the consumer level, and at the consumer level. These "losses" include waste and spoilage of food as well as the removal of inedible portions and some weight changes that occur due to shrinkage or processing. Data are from the USDA Econo…
Food group	Food commodity	Preparation	Weight basis	Loss at consumer level - Cooking loss & uneaten food (%)	Loss at consumer level - Nonedible Share (%)	Loss from retail/institutional to consumer level (%)	Loss primary to retail weight (%)	Loss adjustment factor, consumer level - Cooking loss & uneaten food	Loss adjustment factor, consumer level - Nonedible Share	Loss adjustment factor, retail/institutional to consumer level	Loss adjustment factor, primary to retail weight
Grains	White & Whole flour	NA	Product weight	20	0	12	0	1.25	1	1.13636	1
Grains	Durum flour	NA	Product weight	20	0	12	0	1.25	1	1.13636	1
Grains	Corn flour and meal	NA	Product weight	20	0	12	0	1.25	1	1.13636	1
Grains	Hominy and grits	NA	Product weight	20	0	12	0	1.25	1	1.13636	1
Grains	Cornstarch	NA	Product weight	20	0	12	0	1.25	1	1.13636	1
Grains	Rye Flour	NA	Product weight	20	0	12	0	1.25	1	1.13636	1
Grains	Rice	NA	Product weight	20	0	12	0	1.25	1	1.13636	1
Grains	Oat products	NA	Product weight	20	20	12	0	1.25	1.25	1.13636	1
Grains	Barley products	NA	Product weight	20	20	12	0	1.25	1.25	1.13636	1
Grains -- User Defined
Dark Green Leafy Vegetables	Broccoli	Fresh	Farm weight	20	39	11.9542	8	1.25	1.63934	1.13577	1.08696
Dark Green Leafy Vegetables	Broccoli	Frozen	Farm weight	16	0	6	24.812	1.19048	1	1.06383	1.33
Dark Green Leafy Vegetables	Collard Greens	Fresh	Farm weight	20	43	37.4668	12	1.25	1.75439	1.59915	1.13636
Dark Green Leafy Vegetables	Escarole /endive	Fresh	Farm weight	20	43	37.4668	12	1.25	1.75439	1.59915	1.13636
Dark Green Leafy Vegetables	Kale	Fresh	Farm weight	20	39	39.1744	12	1.25	1.63934	1.64404	1.13636
Dark Green Leafy Vegetables	Romaine & Leaf Lettuce	Fresh	Farm weight	20	20.667	13.911	7	1.25	1.26051	1.16159	1.07527
Dark Green Leafy Vegetables	Mustard Greens	Fresh	Farm weight	20	7	63.6433	12	1.25	1.07527	2.75052	1.13636
Dark Green Leafy Vegetables	Spinach	Fresh	Farm weight	20	28	14.394	12	1.25	1.38889	1.16814	1.13636
Dark Green Leafy Vegetables	Spinach	Frozen	Farm weight	23	0	6	30.07	1.2987	1	1.06383	1.43
Dark Green Leafy Vegetables	Turnip greens	Fresh	Farm weight	20	30	40.9721	12	1.25	1.42857	1.69412	1.13636
Dark Green Leafy Vegetables -- User Defined
Red and Orange Vegetables	Carrots	Fresh	Farm weight	20	11	5.13978	3	1.25	1.1236	1.05418	1.03093
Red and Orange Vegetables	Carrots	Canned	Farm weight	10	0	6	25	1.11111	1	1.06383	1.33333
Red and Orange Vegetables	Carrots	Frozen	Farm weight	12	0	6	45.055	1.13636	1	1.06383	1.82
Red and Orange Vegetables	Pumpkin	Fresh	Farm weight	20	30	11.2356	10	1.25	1.42857	1.12658	1.11111
Red and Orange Vegetables	Winter Squash	Fresh	Farm weight	20	17	12.4697	10	1.25	1.20482	1.14246	1.11111
Red and Orange Vegetables	Sweet Potatoes	Fresh	Farm weight	31	28	14.1804	10	1.44928	1.38889	1.16524	1.11111
Red and Orange Vegetables	Tomatoes	Fresh	Farm weight	20	9	13.1821	15	1.25	1.0989	1.15184	1.17647
Red and Orange Vegetables	Tomatoes	Canned	Farm weight	10	0	6	59	1.11111	1	1.06383	2.43902
Orange Vegetables -- User Defined
Dry Bean & Peas	Dry edible beans	Dried	Farm weight	10	0	6	0	1.11111	1	1.06383	1
Dry Bean & Peas	Dry peas and lentils	Dried	Farm weight	10	0	6	0	1.11111	1	1.06383	1
Starchy Vegetables	Green Peas	Canned	Farm weight	10	0	6	34	1.11111	1	1.06383	1.51515
Starchy Vegetables	Green Peas	Frozen	Farm weight	17	0	6	8.257	1.20482	1	1.06383	1.09
Starchy Vegetables	Lima beans	Fresh	Farm weight	20	56	12	8	1.25	2.27273	1.13636	1.08696
Starchy Vegetables	Lima beans	Frozen	Farm weight	32	0	6	4.7619	1.47059	1	1.06383	1.05
Starchy Vegetables	Potatoes	Fresh	Farm weight	30	0	6.49919	4	1.42857	1	1.06951	1.04167
Starchy Vegetables	Potatoes	Canned	Farm weight	10	0	6	29	1.11111	1	1.06383	1.40845
Starchy Vegetables	Potatoes	Frozen	Farm weight	32	0	6	50	1.47059	1	1.06383	2
Starchy Vegetables	Potatoes	DeHydrated	Farm weight	10	0	6	86	1.11111	1	1.06383	7.14286
Starchy Vegetables	Sweet Corn	Fresh	Farm weight	32	64	0.611543	8	1.47059	2.77778	1.00615	1.08696
Starchy Vegetables	Sweet Corn	Canned	Farm weight	10	0	6	27	1.11111	1	1.06383	1.36986
Starchy Vegetables	Sweet Corn	Frozen	Farm weight	14	0	6	72.973	1.16279	1	1.06383	3.7
Starchy Vegetables -- User Defined
Other Vegetables	Artichokes	Fresh	Farm weight	20	60	19.3056	7	1.25	2.5	1.23924	1.07527
Other Vegetables	Asparagus	Fresh	Farm weight	20	47	9.411	9	1.25	1.88679	1.10389	1.0989
Other Vegetables	Asparagus	Canned	Farm weight	10	0	6	18	1.11111	1	1.06383	1.21951
Other Vegetables	Asparagus	Frozen	Farm weight	30	0	6	47.917	1.42857	1	1.06383	1.92001
Other Vegetables	Bell peppers	Fresh	Farm weight	20	18	7.76954	8	1.25	1.21951	1.08424	1.08696
Other Vegetables	Brussels sprouts	Fresh	Farm weight	20	10	18.7565	8	1.25	1.11111	1.23087	1.08696
Other Vegetables	Cabbage	Fresh	Farm weight	20	20	14.0756	7	1.25	1.25	1.16381	1.07527
Other Vegetables	Cabbage	Canned	Farm weight	10	0	6	56	1.11111	1	1.06383	2.27273
Other Vegetables	Cauliflower	Fresh	Farm weight	20	61	14.0076	8	1.25	2.5641	1.16289	1.08696
Other Vegetables	Cauliflower	Frozen	Farm weight	17	0	6	30.067	1.20482	1	1.06383	1.42994
Other Vegetables	Celery	Fresh	Farm weight	20	11	5.10302	7	1.25	1.1236	1.05377	1.07527
Other Vegetables	Chilly Peppers	Canned	Farm weight	10	0	6	27	1.11111	1	1.06383	1.36986
Other Vegetables	Cucumbers	Fresh	Farm weight	20	27	6.13012	8	1.25	1.36986	1.0653	1.08696
Other Vegetables	Cucumbers	Canned	Farm weight	10	0	6	60	1.11111	1	1.06383	2.5
Other Vegetables	Eggplant	Fresh	Farm weight	27	19	21.3276	10	1.36986	1.23457	1.27109	1.11111
Other Vegetables	Garlic	Fresh	Farm weight	20	13	7.42258	19	1.25	1.14943	1.08018	1.23457
Other Vegetables	Head lettuce	Fresh	Farm weight	20	16	8.7262	7	1.25	1.19048	1.0956	1.07527
Other Vegetables	Mushrooms	Fresh	Farm weight	20	3	12.6996	6	1.25	1.03093	1.14547	1.06383
Other Vegetables	Mushrooms	Canned	Farm weight	10	0	6	35	1.11111	1	1.06383	1.53846
Other Vegetables	Okra	Fresh	Farm weight	20	14	24.418	12	1.25	1.16279	1.32307	1.13636
Other Vegetables	Onions	Fresh	Farm weight	35	10	9.75678	6	1.53846	1.11111	1.10812	1.06383
Other Vegetables	Onions	Dehydrated	Farm weight	10	0	6	89	1.11111	1	1.06383	9.09091
Other Vegetables	Radishes	Fresh	Farm weight	20	10	21.0213	3	1.25	1.11111	1.26616	1.03093
Other Vegetables	Snap beans	Fresh	Farm weight	22	12	18.5623	6	1.28205	1.13636	1.22793	1.06383
Other Vegetables	Snap beans	Canned	Farm weight	10	0	6	40	1.11111	1	1.06383	1.66667
Other Vegetables	Snap beans	Frozen	Farm weight	20	0	6	15.254	1.25	1	1.06383	1.18
Other Vegetables	Summer Squa	Fresh	Farm weight	20	17	12.4697	10	1.25	1.20482	1.14246	1.11111
Other Vegetables -- User Defined
Citrus	Orange	Fresh	Fresh weight equivalent	20	27	11.5697	3	1.25	1.36986	1.13083	1.03093
Citrus	Orange	Juice	Fresh weight equivalent	10	0	6	35.1327	1.11111	1	1.06383	1.54161
Citrus	Grapefruit	Fresh	Fresh weight equivalent	20	50	12.8367	3	1.25	2	1.14727	1.03093
Citrus	Grapefruit	Juice	Fresh weight equivalent	10	0	6	29.0015	1.11111	1	1.06383	1.40848
Citrus	Lemons	Fresh	Fresh weight equivalent	20	47	6.96307	4	1.25	1.88679	1.07484	1.04167
Citrus	Lemons	Juice	Fresh weight equivalent	10	0	6	66.3462	1.11111	1	1.06383	2.97143
Citrus	Limes	Fresh	Fresh weight equivalent	20	16	8.31746	5	1.25	1.19048	1.09072	1.05263
Citrus	Limes	Juice	Fresh weight equivalent	10	0	6	66.75	1.11111	1	1.06383	3.00752
Citrus	Tangerines	Fresh	Fresh weight equivalent	20	26	20.4377	5	1.25	1.35135	1.25688	1.05263
Citrus -- User Defined
Non-Citrus	Apples	Fresh	Fresh weight equivalent	20	10	8.61998	4	1.25	1.11111	1.09433	1.04167
Non-Citrus	Apples & Applesauce	Canned	Fresh weight equivalent	10	0	6	20	1.11111	1	1.06383	1.25
Non-Citrus	Apples	Frozen	Fresh weight equivalent	10	0	6	40.1198	1.11111	1	1.06383	1.67
Non-Citrus	Apples	Dried	Fresh weight equivalent	10	0	6	87.5	1.11111	1	1.06383	8
Non-Citrus	Apples	Juice	Fresh weight equivalent	10	0	6	26.6667	1.11111	1	1.06383	1.36364
Non-Citrus	Apricots	Fresh	Fresh weight equivalent	20	7	35.0576	9	1.25	1.07527	1.53982	1.0989
Non-Citrus	Apricots	Canned	Fresh weight equivalent	10	0	6	30.5556	1.11111	1	1.06383	1.44
Non-Citrus	Apricots	Frozen	Fresh weight equivalent	10	0	6	9.09091	1.11111	1	1.06383	1.1
Non-Citrus	Apricots	Dried	Fresh weight equivalent	10	0	6	82.0144	1.11111	1	1.06383	5.56
Non-Citrus	Avocados	Fresh	Fresh weight equivalent	20	26	9.32329	6	1.25	1.35135	1.10282	1.06383
Non-Citrus	Bananas	Fresh	Fresh weight equivalent	20	36	7.96625	0	1.25	1.5625	1.08656	1
Non-Citrus	Blackberries	Frozen	Fresh weight equivalent	10	0	6	0	1.11111	1	1.06383	1
Non-Citrus	Blueberries	Fresh	Fresh weight equivalent	20	5	5.24677	8	1.25	1.05263	1.05537	1.08696
Non-Citrus	Blueberries	Frozen	Fresh weight equivalent	10	0	6	2.91262	1.11111	1	1.06383	1.03
Non-Citrus	Cantaloup	Fresh	Fresh weight equivalent	20	49	12.199	8	1.25	1.96078	1.13894	1.08696
Non-Citrus	Cherries	Fresh	Fresh weight equivalent	20	9	3.87213	8	1.25	1.0989	1.04028	1.08696
Non-Citrus	Cherries	Canned	Fresh weight equivalent	10	0	6	16.318	1.11111	1	1.06383	1.195
Non-Citrus	Cherries	Frozen	Fresh weight equivalent	10	0	6	9.90991	1.11111	1	1.06383	1.11
Non-Citrus	Cranberries	Fresh	Fresh weight equivalent	20	2	5.972	4	1.25	1.02041	1.06351	1.04167
Non-Citrus	Cranberries	Juice	Fresh weight equivalent	10	0	6	3.2	1.11111	1	1.06383	1.03306
Non-Citrus	Dates	Dried	Fresh weight equivalent	10	10	6	6.54206	1.11111	1.11111	1.06383	1.07
Non-Citrus	Figs	Dried	Fresh weight equivalent	10	0	6	65.9864	1.11111	1	1.06383	2.94
Non-Citrus	Grapes	Fresh	Fresh weight equivalent	20	4	7.58452	9	1.25	1.04167	1.08207	1.0989
Non-Citrus	Grapes	Juice	Fresh weight equivalent	10	0	6	19.0909	1.11111	1	1.06383	1.23596
Non-Citrus	Honeydew melons	Fresh	Fresh weight equivalent	20	54	22.7609	8	1.25	2.17391	1.29468	1.08696
Non-Citrus	Kiwifruit	Fresh	Fresh weight equivalent	20	14	12.6555	9	1.25	1.16279	1.14489	1.0989
Non-Citrus	Mangoes	Fresh	Fresh weight equivalent	20	31	14.4652	5	1.25	1.44928	1.16911	1.05263
Non-Citrus	Olives	Canned	Fresh weight equivalent	10	0	6	5.66038	1.11111	1	1.06383	1.06
Non-Citrus	Peaches	Fresh	Fresh weight equivalent	35	7	11.9105	5	1.53846	1.07527	1.13521	1.05263
Non-Citrus	Peaches	Canned	Fresh weight equivalent	10	0	6	16.6667	1.11111	1	1.06383	1.2
Non-Citrus	Peaches	Frozen	Fresh weight equivalent	10	0	6	20	1.11111	1	1.06383	1.25
Non-Citrus	Peaches	Dried	Fresh weight equivalent	10	0	6	83.3749	1.11111	1	1.06383	6.015
Non-Citrus	Pears	Fresh	Fresh weight equivalent	20	10	17.5789	5	1.25	1.11111	1.21328	1.05263
Non-Citrus	Pears	Canned	Fresh weight equivalent	10	0	6	0	1.11111	1	1.06383	1
Non-Citrus	Pears	Dried	Fresh weight equivalent	10	0	6	84.1521	1.11111	1	1.06383	6.31
Non-Citrus	Pineapple	Fresh	Fresh weight equivalent	20	49	14.6291	5	1.25	1.96078	1.17136	1.05263
Non-Citrus	Pineapple	Canned	Fresh weight equivalent	10	0	6	41.4862	1.11111	1	1.06383	1.709
Non-Citrus	Pineapple	Juice	Fresh weight equivalent	10	0	6	41.3333	1.11111	1	1.06383	1.70455
Non-Citrus	Papayas	Fresh	Fresh weight equivalent	20	33	54.8907	5	1.25	1.49254	2.21684	1.05263
Non-Citrus	Plums	Fresh	Fresh weight equivalent	20	6	17.3166	5	1.25	1.06383	1.20943	1.05263
Non-Citrus	Plums	Canned	Fresh weight equivalent	10	0	6	33.7748	1.11111	1	1.06383	1.51
Non-Citrus	Plums & Prunes	Frozen	Fresh weight equivalent	10	0	6	15.2542	1.11111	1	1.06383	1.18
Non-Citrus	Plums	Dried	Fresh weight equivalent	10	0	6	61.5385	1.11111	1	1.06383	2.6
Non-Citrus	Prunes	Juice	Fresh weight equivalent	10	0	6	27.6923	1.11111	1	1.06383	1.38298
Non-Citrus	Raisins	Dried	Fresh weight equivalent	10	0	6	79.4491	1.11111	1	1.06383	4.86597
Non-Citrus	Raspberry	Fresh	Fresh weight equivalent	16.6667	3.66667	7.00025	5.33333	1.2	1.03806	1.07527	1.05634
Non-Citrus	Raspberry	Frozen	Fresh weight equivalent	10	0	6	4.7619	1.11111	1	1.06383	1.05
Non-Citrus	Strawberries	Fresh	Fresh weight equivalent	20	6	9.75398	8	1.25	1.06383	1.10808	1.08696
Non-Citrus	Strawberries	Frozen	Fresh weight equivalent	10	0	6	-12.3596	1.11111	1	1.06383	0.89
Non-Citrus	Watermelon	Fresh	Fresh weight equivalent	20	48	16.7773	10	1.25	1.92308	1.2016	1.11111
Non-Citrus -- User Defined
Dairy	beverage milk	plain whole milk	Product weight	20	0	12	0	1.25	1	1.13636	1
Dairy	beverage milk	plain 2 percent milk	Product weight	20	0	12	0	1.25	1	1.13636	1
Dairy	beverage milk	plain 1 percent milk	Product weight	20	0	12	0	1.25	1	1.13636	1
Dairy	beverage milk	plain skim milk	Product weight	20	0	12	0	1.25	1	1.13636	1
Dairy	beverage milk	flavored whole milk	Product weight	20	0	12	0	1.25	1	1.13636	1
Dairy	beverage milk	flavored lower fat milk	Product weight	20	0	12	0	1.25	1	1.13636	1
Dairy	yogurt	yogurt	Product weight	20	0	12	0	1.25	1	1.13636	1
Dairy	American	cheddar	Product weight	13	0	6	0	1.14943	1	1.06383	1
Dairy	Italian	Provolone	Product weight	13	0	6	0	1.14943	1	1.06383	1
Dairy	Italian	Romano	Product weight	13	0	6	0	1.14943	1	1.06383	1
Dairy	Italian	Parmesean	Product weight	13	0	6	0	1.14943	1	1.06383	1
Dairy	Italian	Mozzarella	Product weight	13	0	6	0	1.14943	1	1.06383	1
Dairy	Italian	Ricotta	Product weight	13	0	6	0	1.14943	1	1.06383	1
Dairy	Misc. Cheese	Swiss	Product weight	13	0	6	0	1.14943	1	1.06383	1
Dairy	Misc. Cheese	Brick	Product weight	13	0	6	0	1.14943	1	1.06383	1
Dairy	Misc. Cheese	Muenster	Product weight	13	0	6	0	1.14943	1	1.06383	1
Dairy	Misc. Cheese	Blue	Product weight	13	0	6	0	1.14943	1	1.06383	1
Dairy	Misc. Cheese	other	Product weight	13	0	6	0	1.14943	1	1.06383	1
Dairy	cottage cheese	regular	Product weight	20	0	12	0	1.14943	1	1.06383	1
Dairy	cottage cheese	lowfat	Product weight	20	0	12	0	1.25	1	1.13636	1
Dairy	frozen dairy	ice cream	Product weight	20	0	12	0	1.25	1	1.13636	1
Dairy	frozen dairy	lowfat ice cream	Product weight	20	0	12	0	1.25	1	1.13636	1
Dairy	frozen dairy	other	Product weight	20	0	12	0	1.25	1	1.13636	1
Dairy	evaporated and condensed milk	canned whole	Product weight	20	0	12	0	1.25	1	1.13636	1
Dairy	evaporated and condensed milk	bulk whole	Product weight	20	0	12	0	1.25	1	1.13636	1
Dairy	evaporated and condensed milk	skim	Product weight	20	0	12	0	1.25	1	1.13636	1
Dairy	dry milk	whole	Product weight	1	0	1	0	1.25	1	1.13636	1
Dairy	dry milk	nonfat	Product weight	1	0	1	0	1.0101	1	1.0101	1
Dairy	dry milk	buttermilk	Product weight	1	0	1	0	1.0101	1	1.0101	1
Dairy Substitute - Vegan Option	Soymilk1	Soymilk, original and vanilla, with added calcium, vitamins A and D		20	0	12	0	1.25	1	1.13636	1
Meat Substitute - Vegan Option	Tofu2	Tofu, firm, prepared with calcium sulfate and magnesium chloride (nigari) #16126		10	0	6	0	1.11111	1	1.06383	1
Protein rich foods	Dry edible beans	cooked	Weight of dried product in serving	10	0	6	0	1.11111	1	1.06383	1
Protein rich foods	Dry peas and lentils	cooked	Weight of dried product in serving	10	0	6	0	1.11111	1	1.06383	1	(
Protein rich foods	beef	cooked	Carcass weight	32	0	4.34456	33.1	1.47059	1	1.04542	1.49477
Protein rich foods	veal	cooked	Carcass weight	35	0	25.4136	31.5	1.53846	1	1.34073	1.45985
Protein rich foods	pork	cooked	Carcass weight	39	0	4.3566	27.1	1.63934	1	1.04555	1.37174
Protein rich foods	lamb	cooked	Carcass weight	36	0	12.2995	34.2	1.5625	1	1.14024	1.51976
Protein rich foods	chicken	cooked	Carcass weight	40	0	3.97135	39.8	1.66667	1	1.04136	1.66113
Protein rich foods	turkey	cooked	Carcass weight	32	0	3.46101	21	1.47059	1	1.03585	1.26582
Protein rich foods	fish and shellfish	fresh and frozen	Edible weight	33	0	8.69627	0	1.49254	1	1.09525	1
Protein rich foods	salmon	canned	Edible weight	10	0	6	0	1.11111	1	1.06383	1
Protein rich foods	sardines	canned	Edible weight	10	0	6	0	1.11111	1	1.06383	1
Protein rich foods	tuna	canned	Edible weight	10	0	6	0	1.11111	1	1.06383	1
Protein rich foods	shellfish	canned	Edible weight	33	0	9.27159	0	1.49254	1	1.10219	1
Protein rich foods	other	canned	Edible weight	19.2	0	7.19357	0	1.23762	1	1.07751	1
Protein rich foods	cured	cured	Edible weight	10	0	6	0	1.11111	1	1.06383	1
Protein rich foods	eggs	cooked	Farm weight	15	12	9	1.5	1.17647	1.13636	1.0989	1.01523
Protein rich foods	peanuts	raw	Shelled weight	10	0	6	0	1.11111	1	1.06383	1
Protein rich foods	coconuts	raw	Dessicated	10	0	6	0	1.11111	1	1.06383	1
Protein rich foods	almonds	raw	Shelled weight	10	0	6	0	1.11111	1	1.06383	1
Protein rich foods	hazelnuts	raw	Shelled weight	10	0	6	0	1.11111	1	1.06383	1
Protein rich foods	pecans	raw	Shelled weight	10	0	6	0	1.11111	1	1.06383	1
Protein rich foods	walnuts	raw	Shelled weight	10	0	6	0	1.11111	1	1.06383	1
Protein rich foods	macadamia nuts	raw	Shelled weight	10	0	6	0	1.11111	1	1.06383	1
Protein rich foods	pistachios	raw	Shelled weight	10	0	6	0	1.11111	1	1.06383	1
Protein rich foods	other nuts	raw	Shelled weight	10	0	6	0	1.11111	1	1.06383	1
Protein rich foods -- User Defined
Added fats	butter3		Product weight	15	0	7	19.7	1.17647	1	1.07527	1.24533
Added fats	margarine		Product weight	15	0	7	0	1.17647	1	1.07527	1
Added fats	lard		Product weight	0	0	50	0	1	1	2	1
Added fats	edible beef tallow		Product weight	0	0	50	0	1	1	2	1
Added fats	shortening		Product weight	15	0	21	0	1.17647	1	1.26582	1
Added fats	salad and cooking oils		Product weight	20	0	21	0	1.25	1	1.26582	1
Added fats	other edible fats and oils		Product weight	0	0	5	0	1	1	1.05263	1
Added fats	light cream3		Product weight	20	0	12	81.16	1.25	1	1.13636	5.30786
Added fats	half and half3		Product weight	20	0	12	89.09	1.25	1	1.13636	9.1659
Added fats	heavy cream3		Product weight	20	0	12	64.14	1.25	1	1.13636	2.78862
Added fats	sour cream3		Product weight	20	0	12	82.69	1.25	1	1.13636	5.77701
Added fats	cream cheese3		Product weight	20	0	12	67	1.25	1	1.13636	3.0303
Added fats	eggnog3		Product weight	20	0	12	92.39	1.25	1	1.13636	13.1406
Added fats --User Defined
Sweeteners	Refined Cane & Beet Sugar	NA	Dry weight	20	0	11	0	1.25	1	1.1236	1
Sweeteners	HFCS	NA	Dry weight	20	0	11	0	1.25	1	1.1236	1
Sweeteners	Glucose	NA	Dry weight	20	0	11	0	1.25	1	1.1236	1
Sweeteners	Dextrose	NA	Dry weight	20	0	11	0	1.25	1	1.1236	1
Sweeteners	Edible syrups	NA	Dry weight	20	0	11	0	1.25	1	1.1236	1
Sweeteners	Honey	NA	Dry weight	20	0	11	0	1.25	1	1.1236	1
Sweeteners -- User Defined
1 - USDA-ERS does not track soy milk in its food supply data. Losses for soy milk are assumed identical to fluid milk products.
2 - USDA-ERS does not track tofu in its food supply data. Losses for tofu are assumed identical to dry beans, peas, and lentils.
3 - Consumption data in the Food Preferences worksheet represents this product on a fat-weight basis. Therefore, primary to retail weight (column H) converts from fat weight basis to product weight basis

## Sheet: Processing conversions
PROCESSING YIELDS
This worksheet contains estimates of the conversion factors needed to estimate the quantity of agricultural commodities required to produce each primary food commodity. Data come principally from USDA-ERS Agricultural Handbook 697: Weights, Measures, and Conversion Factors for Agricultural Commodities and their Products (ERS, 1992).
Food group	Food commodity	Preparation	Weight basis, food	Agricultural commodity	Weight basis, ag	Conversion (lbs product per lb farm commodity)	Conversion (lbs farm commodity / lb product)	Notes
Grains	White & Whole flour	NA	Product weight	Wheat, white and red	Farm weight	0.86	1.16279	Average of whole wheat and white flour
Grains	Durum flour	NA	Product weight	Wheat, durum	Farm weight	0.73	1.36986	Extraction rate of semolina, farina, and flour (see footnote 2 in Table 28 of AH697)
Grains	Corn flour and meal	NA	Product weight	Corn	Farm weight	0.741	1.34953	Average of corn flour and non-degermed corn meal
Grains	Hominy and grits	NA	Product weight	Corn	Farm weight	0.518	1.9305
Grains	Cornstarch	NA	Product weight	Corn	Farm weight	0.614	1.62866
Grains	Rye Flour	NA	Product weight	Rye	Farm weight	0.87	1.14943	Not included in AH697. Obtained estimate of yield of white rye flour from grain via personal communication with Colleen Zammer of Bay State Milling (January 4, 2012).
Grains	Rice	NA	Product weight	Rice	Farm weight	0.755	1.3245	Average of brown and white rice. From International Rice Research Institute (undated).
Grains	Oat products	NA	Product weight	Oats	Farm weight	0.618	1.61812	Average of oat flour, oatmeal, and ready-to-eat cereal
Grains	Barley products	NA	Product weight	Barley	Farm weight	0.625	1.6	Average of barley flour, pearl barley, and malt
Grains - User defined
Dark Green Leafy Vegetables	Broccoli	Fresh	Farm weight	Broccoli	Farm weight	1	1
Dark Green Leafy Vegetables	Broccoli	Frozen	Farm weight	Broccoli	Farm weight	1	1
Dark Green Leafy Vegetables	Collard Greens	Fresh	Farm weight	Collard Greens	Farm weight	1	1
Dark Green Leafy Vegetables	Escarole /endive	Fresh	Farm weight	Escarole /endive	Farm weight	1	1
Dark Green Leafy Vegetables	Kale	Fresh	Farm weight	Kale	Farm weight	1	1
Dark Green Leafy Vegetables	Romaine & Leaf Lettuce	Fresh	Farm weight	Romaine & Leaf Lettuce	Farm weight	1	1
Dark Green Leafy Vegetables	Mustard Greens	Fresh	Farm weight	Mustard Greens	Farm weight	1	1
Dark Green Leafy Vegetables	Spinach	Fresh	Farm weight	Spinach	Farm weight	1	1
Dark Green Leafy Vegetables	Spinach	Frozen	Farm weight	Spinach	Farm weight	1	1
Dark Green Leafy Vegetables	Turnip greens	Fresh	Farm weight	Turnip greens	Farm weight	1	1
Dark Green Leafy Vegetables - User defined
Red and Orange Vegetables	Carrots	Fresh	Farm weight	Carrots	Farm weight	1	1
Red and Orange Vegetables	Carrots	Canned	Farm weight	Carrots	Farm weight	1	1
Red and Orange Vegetables	Carrots	Frozen	Farm weight	Carrots	Farm weight	1	1
Red and Orange Vegetables	Pumpkin	Fresh	Farm weight	Pumpkin	Farm weight	1	1
Red and Orange Vegetables	Winter Squash	Fresh	Farm weight	Winter Squash	Farm weight	1	1
Red and Orange Vegetables	Sweet Potatoes	Fresh	Farm weight	Sweet Potatoes	Farm weight	1	1
Red and Orange Vegetables	Tomatoes	Fresh	Farm weight	Tomatoes	Farm weight	1	1
Red and Orange Vegetables	Tomatoes	Canned	Farm weight	Tomatoes	Farm weight	1	1
Orange Vegetables - User defined
Dry Bean & Peas	Dry edible beans	Dried	Farm weight	Dry edible beans	Farm weight	1	1
Dry Bean & Peas	Dry peas and lentils	Dried	Farm weight	Dry peas and lentils	Farm weight	1	1
Starchy Vegetables	Green Peas	Canned	Farm weight	Green Peas	Farm weight	1	1
Starchy Vegetables	Green Peas	Frozen	Farm weight	Green Peas	Farm weight	1	1
Starchy Vegetables	Lima beans	Fresh	Farm weight	Lima beans	Farm weight	1	1
Starchy Vegetables	Lima beans	Frozen	Farm weight	Lima beans	Farm weight	1	1
Starchy Vegetables	Potatoes	Fresh	Farm weight	Potatoes	Farm weight	1	1
Starchy Vegetables	Potatoes	Canned	Farm weight	Potatoes	Farm weight	1	1
Starchy Vegetables	Potatoes	Frozen	Farm weight	Potatoes	Farm weight	1	1
Starchy Vegetables	Potatoes	DeHydrated	Farm weight	Potatoes	Farm weight	1	1
Starchy Vegetables	Sweet Corn	Fresh	Farm weight	Sweet Corn	Farm weight	1	1
Starchy Vegetables	Sweet Corn	Canned	Farm weight	Sweet Corn	Farm weight	1	1
Starchy Vegetables	Sweet Corn	Frozen	Farm weight	Sweet Corn	Farm weight	1	1
Starchy Vegetables - User defined
Other Vegetables	Artichokes	Fresh	Farm weight	Artichokes	Farm weight	1	1
Other Vegetables	Asparagus	Fresh	Farm weight	Asparagus	Farm weight	1	1
Other Vegetables	Asparagus	Canned	Farm weight	Asparagus	Farm weight	1	1
Other Vegetables	Asparagus	Frozen	Farm weight	Asparagus	Farm weight	1	1
Other Vegetables	Bell peppers	Fresh	Farm weight	Bell peppers	Farm weight	1	1
Other Vegetables	Brussels sprouts	Fresh	Farm weight	Brussels sprouts	Farm weight	1	1
Other Vegetables	Cabbage	Fresh	Farm weight	Cabbage	Farm weight	1	1
Other Vegetables	Cabbage	Canned	Farm weight	Cabbage	Farm weight	1	1
Other Vegetables	Cauliflower	Fresh	Farm weight	Cauliflower	Farm weight	1	1
Other Vegetables	Cauliflower	Frozen	Farm weight	Cauliflower	Farm weight	1	1
Other Vegetables	Celery	Fresh	Farm weight	Celery	Farm weight	1	1
Other Vegetables	Chilly Peppers	Canned	Farm weight	Chilly Peppers	Farm weight	1	1
Other Vegetables	Cucumbers	Fresh	Farm weight	Cucumbers	Farm weight	1	1
Other Vegetables	Cucumbers	Canned	Farm weight	Cucumbers	Farm weight	1	1
Other Vegetables	Eggplant	Fresh	Farm weight	Eggplant	Farm weight	1	1
Other Vegetables	Garlic	Fresh	Farm weight	Garlic	Farm weight	1	1
Other Vegetables	Head lettuce	Fresh	Farm weight	Head lettuce	Farm weight	1	1
Other Vegetables	Mushrooms	Fresh	Farm weight	Mushrooms	Farm weight	1	1
Other Vegetables	Mushrooms	Canned	Farm weight	Mushrooms	Farm weight	1	1
Other Vegetables	Okra	Fresh	Farm weight	Okra	Farm weight	1	1
Other Vegetables	Onions	Fresh	Farm weight	Onions	Farm weight	1	1
Other Vegetables	Onions	Dehydrated	Farm weight	Onions	Farm weight	1	1
Other Vegetables	Radishes	Fresh	Farm weight	Radishes	Farm weight	1	1
Other Vegetables	Snap beans	Fresh	Farm weight	Snap beans	Farm weight	1	1
Other Vegetables	Snap beans	Canned	Farm weight	Snap beans	Farm weight	1	1
Other Vegetables	Snap beans	Frozen	Farm weight	Snap beans	Farm weight	1	1
Other Vegetables	Summer Squa	Fresh	Farm weight	Summer Squa	Farm weight	1	1
Other Vegetables - User defined
Citrus	Orange	Fresh	Fresh weight equivalent	Orange	Farm weight	1	1
Citrus	Orange	Juice	Fresh weight equivalent	Orange	Farm weight	1	1
Citrus	Grapefruit	Fresh	Fresh weight equivalent	Grapefruit	Farm weight	1	1
Citrus	Grapefruit	Juice	Fresh weight equivalent	Grapefruit	Farm weight	1	1
Citrus	Lemons	Fresh	Fresh weight equivalent	Lemons	Farm weight	1	1
Citrus	Lemons	Juice	Fresh weight equivalent	Lemons	Farm weight	1	1
Citrus	Limes	Fresh	Fresh weight equivalent	Limes	Farm weight	1	1
Citrus	Limes	Juice	Fresh weight equivalent	Limes	Farm weight	1	1
Citrus	Tangerines	Fresh	Fresh weight equivalent	Tangerines	Farm weight	1	1
Citrus - User defined
Non-Citrus	Apples	Fresh	Fresh weight equivalent	Apples	Farm weight	1	1
Non-Citrus	Apples & Applesauce	Canned	Fresh weight equivalent	Apples	Farm weight	1	1
Non-Citrus	Apples	Frozen	Fresh weight equivalent	Apples	Farm weight	1	1
Non-Citrus	Apples	Dried	Fresh weight equivalent	Apples	Farm weight	1	1
Non-Citrus	Apples	Juice	Fresh weight equivalent	Apples	Farm weight	1	1
Non-Citrus	Apricots	Fresh	Fresh weight equivalent	Apricots	Farm weight	1	1
Non-Citrus	Apricots	Canned	Fresh weight equivalent	Apricots	Farm weight	1	1
Non-Citrus	Apricots	Frozen	Fresh weight equivalent	Apricots	Farm weight	1	1
Non-Citrus	Apricots	Dried	Fresh weight equivalent	Apricots	Farm weight	1	1
Non-Citrus	Avocados	Fresh	Fresh weight equivalent	Avocados	Farm weight	1	1
Non-Citrus	Bananas	Fresh	Fresh weight equivalent	Bananas	Farm weight	1	1
Non-Citrus	Blackberries	Frozen	Fresh weight equivalent	Blackberries	Farm weight	1	1
Non-Citrus	Blueberries	Fresh	Fresh weight equivalent	Blueberries	Farm weight	1	1
Non-Citrus	Blueberries	Frozen	Fresh weight equivalent	Blueberries	Farm weight	1	1
Non-Citrus	Cantaloup	Fresh	Fresh weight equivalent	Cantaloup	Farm weight	1	1
Non-Citrus	Cherries	Fresh	Fresh weight equivalent	Cherries	Farm weight	1	1
Non-Citrus	Cherries	Canned	Fresh weight equivalent	Cherries	Farm weight	1	1
Non-Citrus	Cherries	Frozen	Fresh weight equivalent	Cherries	Farm weight	1	1
Non-Citrus	Cranberries	Fresh	Fresh weight equivalent	Cranberries	Farm weight	1	1
Non-Citrus	Cranberries	Juice	Fresh weight equivalent	Cranberries	Farm weight	1	1
Non-Citrus	Dates	Dried	Fresh weight equivalent	Dates	Farm weight	1	1
Non-Citrus	Figs	Dried	Fresh weight equivalent	Figs	Farm weight	1	1
Non-Citrus	Grapes	Fresh	Fresh weight equivalent	Grapes	Farm weight	1	1
Non-Citrus	Grapes	Juice	Fresh weight equivalent	Grapes	Farm weight	1	1
Non-Citrus	Honeydew melons	Fresh	Fresh weight equivalent	Honeydew melons	Farm weight	1	1
Non-Citrus	Kiwifruit	Fresh	Fresh weight equivalent	Kiwifruit	Farm weight	1	1
Non-Citrus	Mangoes	Fresh	Fresh weight equivalent	Mangoes	Farm weight	1	1
Non-Citrus	Olives	Canned	Fresh weight equivalent	Olives	Farm weight	1	1
Non-Citrus	Peaches	Fresh	Fresh weight equivalent	Peaches	Farm weight	1	1
Non-Citrus	Peaches	Canned	Fresh weight equivalent	Peaches	Farm weight	1	1
Non-Citrus	Peaches	Frozen	Fresh weight equivalent	Peaches	Farm weight	1	1
Non-Citrus	Peaches	Dried	Fresh weight equivalent	Peaches	Farm weight	1	1
Non-Citrus	Pears	Fresh	Fresh weight equivalent	Pears	Farm weight	1	1
Non-Citrus	Pears	Canned	Fresh weight equivalent	Pears	Farm weight	1	1
Non-Citrus	Pears	Dried	Fresh weight equivalent	Pears	Farm weight	1	1
Non-Citrus	Pineapple	Fresh	Fresh weight equivalent	Pineapple	Farm weight	1	1
Non-Citrus	Pineapple	Canned	Fresh weight equivalent	Pineapple	Farm weight	1	1
Non-Citrus	Pineapple	Juice	Fresh weight equivalent	Pineapple	Farm weight	1	1
Non-Citrus	Papayas	Fresh	Fresh weight equivalent	Papayas	Farm weight	1	1
Non-Citrus	Plums	Fresh	Fresh weight equivalent	Plums	Farm weight	1	1
Non-Citrus	Plums	Canned	Fresh weight equivalent	Plums	Farm weight	1	1
Non-Citrus	Plums & Prunes	Frozen	Fresh weight equivalent	Plums & Prunes	Farm weight	1	1
Non-Citrus	Plums	Dried	Fresh weight equivalent	Plums	Farm weight	1	1
Non-Citrus	Prunes	Juice	Fresh weight equivalent	Prunes	Farm weight	1	1
Non-Citrus	Raisins	Dried	Fresh weight equivalent	Raisins	Farm weight	1	1
Non-Citrus	Raspberry	Fresh	Fresh weight equivalent	Raspberry	Farm weight	1	1
Non-Citrus	Raspberry	Frozen	Fresh weight equivalent	Raspberry	Farm weight	1	1
Non-Citrus	Strawberries	Fresh	Fresh weight equivalent	Strawberries	Farm weight	1	1
Non-Citrus	Strawberries	Frozen	Fresh weight equivalent	Strawberries	Farm weight	1	1
Non-Citrus	Watermelon	Fresh	Fresh weight equivalent	Watermelon	Farm weight	1	1
Non-Citrus - User defined
Dairy	beverage milk	plain whole milk	Product weight	fluid milk	Farm weight (milk fat equivalent basis)	1.12121	0.891892
Dairy	beverage milk	plain 2 percent milk	Product weight	fluid milk	Farm weight (milk fat equivalent basis)	1.86869	0.535135
Dairy	beverage milk	plain 1 percent milk	Product weight	fluid milk	Farm weight (milk fat equivalent basis)	3.81443	0.262162
Dairy	beverage milk	plain skim milk	Product weight	fluid milk	Farm weight (milk fat equivalent basis)	18.5	0.0540541
Dairy	beverage milk	flavored whole milk	Product weight	fluid milk	Farm weight (milk fat equivalent basis)	1.12121	0.891892
Dairy	beverage milk	flavored lower fat milk	Product weight	fluid milk	Farm weight (milk fat equivalent basis)	2.12644	0.47027
Dairy	yogurt	yogurt	Product weight	fluid milk	Farm weight (milk fat equivalent basis)	2.12644	0.47027
Dairy	American	cheddar	Product weight	fluid milk	Farm weight (milk fat equivalent basis)	0.121311	8.24324
Dairy	Italian	Provolone	Product weight	fluid milk	Farm weight (milk fat equivalent basis)	0.149495	6.68919
Dairy	Italian	Romano	Product weight	fluid milk	Farm weight (milk fat equivalent basis)	0.147528	6.77838
Dairy	Italian	Parmesean	Product weight	fluid milk	Farm weight (milk fat equivalent basis)	0.170037	5.88108
Dairy	Italian	Mozzarella	Product weight	fluid milk	Farm weight (milk fat equivalent basis)	0.205556	4.86486
Dairy	Italian	Ricotta	Product weight	fluid milk	Farm weight (milk fat equivalent basis)	0.285054	3.50811
Dairy	Misc. Cheese	Swiss	Product weight	fluid milk	Farm weight (milk fat equivalent basis)	0.145842	6.85676
Dairy	Misc. Cheese	Brick	Product weight	fluid milk	Farm weight (milk fat equivalent basis)	0.132143	7.56757
Dairy	Misc. Cheese	Muenster	Product weight	fluid milk	Farm weight (milk fat equivalent basis)	0.137037	7.2973
Dairy	Misc. Cheese	Blue	Product weight	fluid milk	Farm weight (milk fat equivalent basis)	0.137037	7.2973
Dairy	Misc. Cheese	other	Product weight	fluid milk	Farm weight (milk fat equivalent basis)	0.137841	7.25473
Dairy	cottage cheese	regular	Product weight	fluid milk	Farm weight (milk fat equivalent basis)	0.925	1.08108
Dairy	cottage cheese	lowfat	Product weight	fluid milk	Farm weight (milk fat equivalent basis)	7.4	0.135135
Dairy	frozen dairy	ice cream	Product weight	fluid milk	Farm weight (milk fat equivalent basis)	0.37	2.7027
Dairy	frozen dairy	lowfat ice cream	Product weight	fluid milk	Farm weight (milk fat equivalent basis)	1.85	0.540541
Dairy	frozen dairy	other	Product weight	fluid milk	Farm weight (milk fat equivalent basis)	3.7	0.27027
Dairy	evaporated and condensed milk	canned whole	Product weight	fluid milk	Farm weight (milk fat equivalent basis)	0.45122	2.21622
Dairy	evaporated and condensed milk	bulk whole	Product weight	fluid milk	Farm weight (milk fat equivalent basis)	0.45122	2.21622
Dairy	evaporated and condensed milk	skim	Product weight	fluid milk	Farm weight (milk fat equivalent basis)	18.5	0.0540541
Dairy	dry milk	whole	Product weight	fluid milk	Farm weight (milk fat equivalent basis)	0.139623	7.16216
Dairy	dry milk	nonfat	Product weight	fluid milk	Farm weight (milk fat equivalent basis)	4.625	0.216216
Dairy	dry milk	buttermilk	Product weight	fluid milk	Farm weight (milk fat equivalent basis)	0.698113	1.43243
Dairy Substitute - Vegan Option	Soymilk	Soymilk, original and vanilla, with added calcium, vitamins A and D		fluid soymilk	Farm weight	6	0.166667	Obtained conversion factor via personal communication with Ms. Melinda Anderson with the University of Illinios National Soybean Research Laboratory on Sept. 25, 2012 (Jpicardy)
Meat Substitute - Vegan Option	Tofu	Tofu, firm, prepared with calcium sulfate and magnesium chloride (nigari) #16126		firm tofu	Farm weight	2.5	0.4	Obtained conversion factor via personal communication with Dr. Karl Weingartner with the University of Illinios National Soybean Research Laboratory on Oct. 30, 2012 (Jpicardy)
Protein rich foods	Dry edible beans	cooked	Product weight	Dry beans	Farm weight	1	1
Protein rich foods	Dry peas and lentils	cooked	Product weight	Dry peas and lentils	Farm weight	1	1
Protein rich foods	beef	cooked	Carcass weight	beef	Live weight	0.602	1.66113
Protein rich foods	veal	cooked	Carcass weight	veal	Live weight	0.632	1.58228
Protein rich foods	pork	cooked	Carcass weight	pork	Live weight	0.724	1.38122
Protein rich foods	lamb	cooked	Carcass weight	lamb	Live weight	0.508	1.9685
Protein rich foods	chicken	fresh and frozen	Carcass weight	chicken	Live weight	0.7225	1.38408
Protein rich foods	turkey	canned	Carcass weight	turkey	Live weight	0.7913	1.26374
Protein rich foods	fish and shellfish	canned	Edible weight	fish and shellfish	Harvested weight	NA	NA	Seafood products are assumed to be 100% obtained from capture fisheries. Therefore, processing yields are not needed for land calculations
Protein rich foods	salmon	canned	Edible weight	salmon	Harvested weight	NA	NA	Seafood products are assumed to be 100% obtained from capture fisheries. Therefore, processing yields are not needed for land calculations
Protein rich foods	sardines	canned	Edible weight	sardines	Harvested weight	NA	NA	Seafood products are assumed to be 100% obtained from capture fisheries. Therefore, processing yields are not needed for land calculations
Protein rich foods	tuna	canned	Edible weight	tuna	Harvested weight	NA	NA	Seafood products are assumed to be 100% obtained from capture fisheries. Therefore, processing yields are not needed for land calculations
Protein rich foods	shellfish	cured	Edible weight	shellfish	Harvested weight	NA	NA	Seafood products are assumed to be 100% obtained from capture fisheries. Therefore, processing yields are not needed for land calculations
Protein rich foods	other	cooked	Edible weight	other	Harvested weight	NA	NA	Seafood products are assumed to be 100% obtained from capture fisheries. Therefore, processing yields are not needed for land calculations
Protein rich foods	cured	cured	Edible weight	cured	Harvested weight	NA	NA	Seafood products are assumed to be 100% obtained from capture fisheries. Therefore, processing yields are not needed for land calculations
Protein rich foods	eggs	cooked	Farm weight	eggs	Farm weight	1	1
Protein rich foods	peanuts	raw	Shelled weight	peanuts	Farm weight	1	1
Protein rich foods	coconuts	raw	Dessicated	coconuts	Dessicated	no data	no data
Protein rich foods	almonds	raw	Shelled weight	almonds	In-shell weight	0.6	1.66667
Protein rich foods	hazelnuts	raw	Shelled weight	hazelnuts	In-shell weight	0.4	2.5
Protein rich foods	pecans	raw	Shelled weight	pecans	In-shell weight	0.5	2
Protein rich foods	walnuts	raw	Shelled weight	walnuts	In-shell weight	0.4	2.5
Protein rich foods	macadamia nuts	raw	Shelled weight	macadamia nuts	In-shell weight	0.38	2.63158
Protein rich foods	pistachios	raw	Shelled weight	pistachios	In-shell weight	0.43	2.32558
Protein rich foods	other nuts	raw	Shelled weight	other nuts	In-shell weight	no data	no data
Protein rich foods - User defined
Added fats	butter		Product weight	fluid milk	Farm weight (milk fat equivalent basis)	0.04625	21.6216
Added fats	margarine		Product weight	Soybean, Corn, Animal Fats	Farm weight	see notes	see notes	Multiple oil sources. Agricultural commodity requirements calculated for indivdual component crops in "Land requirements" worksheet (Column E).
Added fats	lard		Product weight	pork	Live weight	0.057	17.5439
Added fats	edible beef tallow		Product weight	beef	Live weight	0.107156	9.33219
Added fats	shortening		Product weight	soybean	Farm weight	see notes	see notes	Multiple oil sources. Agricultural commodity requirements calculated for indivdual component crops in "Land requirements" worksheet (Column E).
Added fats	salad and cooking oils		Product weight	Soybeans, cottonseed, corn, edible rapseed, (no peanut), and olive	Farm weight	see notes	see notes	Multiple oil sources. Agricultural commodity requirements calculated for indivdual component crops in "Land requirements" worksheet (Column E).
Added fats	other edible fats and oils		Product weight	Soybean, Cottonseed, Corn, Peanut, edible rapeseed (no olive)	Farm weight	see notes	see notes	Multiple oil sources. Agricultural commodity requirements calculated for indivdual component crops in "Land requirements" worksheet (Column E).
Added fats	light cream		Product weight	fluid milk	Farm weight (milk fat equivalent basis)	0.196391	5.09189
Added fats	half and half		Product weight	fluid milk	Farm weight (milk fat equivalent basis)	0.339138	2.94865
Added fats	heavy cream		Product weight	fluid milk	Farm weight (milk fat equivalent basis)	0.103179	9.69189
Added fats	sour cream		Product weight	fluid milk	Farm weight (milk fat equivalent basis)	0.213749	4.67838
Added fats	cream cheese		Product weight	fluid milk	Farm weight (milk fat equivalent basis)	0.112121	8.91892
Added fats	eggnog		Product weight	fluid milk	Farm weight (milk fat equivalent basis)	0.486202	2.05676
Added fats - User defined
Sweeteners	Refined Cane & Beet Sugar	NA	Dry weight	Sugar cane and sugar beet	Farm weight	0.1402	7.13267	Weighted average based on recovery rates and acreage data from Mr. Stephen Haley with ERS (JP Mar 2012)
Sweeteners	HFCS	NA	Dry weight	Corn	Farm weight	0.7	1.42857
Sweeteners	Glucose	NA	Dry weight	Corn	Farm weight	0.491	2.03666	Glucose is also known as dextrose.
Sweeteners	Dextrose	NA	Dry weight	Corn	Farm weight	0.491	2.03666	Anhydrous, moisture-free
Sweeteners	Edible syrups	NA	Dry weight	Raw Sap to Maple Syrup	Product weight	no data	no data
Sweeteners	Honey	NA	Dry weight	Honey	Product weight	0.78	1.28205
Sweeteners - User defined
1 - International Rice Research Institute (IRRI). Undated. Rice Milling. Agricultural Engineering Unit, IRRI. Available at Web site: http://www.knowledgebank.irri.org/postproductioncourse/factsheetsNRefences/Milling/Teaching%20Manual%20Rice%20Milling.doc (verified 13 February 2015).
											0.0285714	=1.6/56

## Sheet: Dairy processing conversions
DAIRY CONVERSION TABLE
Dairy product	Weight basis	Milk fat content (percent)	Milk non-fat solids (percent)	Total milk solids (percent)		Per capita intake (lbs/yr)	Per capita consumption - consumer level (lbs/yr)	Per capita consumption - retail level (lbs/yr)	Per capita consumption - primary level (lbs/yr)		Milk fat in diet (lbs)	Milk non-fat solids in diet (lbs)	Total milk solids in diet (lbs)	Notes
plain whole	product weight	0.033	0.0825	0.1155		54.8837	68.6046	77.9598	77.9598		2.57267	6.43169	9.00436
plain 2 percent	product weight	0.0198	0.0825	0.1023		62.941	78.6762	89.4048	89.4048		1.77021	7.37589	9.14611	Data on all lowfat milk aggregated in Table 16 of AH-697. Used values from NDB.
plain 1 percent	product weight	0.0097	0.0825	0.0922		22.8484	28.5605	32.4551	32.4551		0.314814	2.67755	2.99236	Data on all lowfat milk aggregated in Table 16 of AH-697. Used values from NDB.
plain skim	product weight	0.002	0.0825	0.0845		28.1515	35.1894	39.988	39.988		0.079976	3.29901	3.37898
flavored whole	product weight	0.033	0.0825	0.1155		2.246	2.8075	3.19034	3.19034		0.105281	0.263203	0.368484
flavored lower fat	product weight	0.0174	0.0825	0.0999		12.7979	15.9973	18.1788	18.1788		0.316311	1.49975	1.81606
yogurt	product weight	0.0174	0.0825	0.0999		12.8273	16.0341	18.2206	18.2206		0.317038	1.5032	1.82023	No value reported in AH-697. Assumed identical to low-fat milk.
cheddar	product weight	0.305	0.305	0.61		8.24097	9.47238	10.077	10.077		3.07349	3.07349	6.14697	Derived based on minimum milkfat in solids and moisture percentage.
Provolone	product weight	0.2475	0.3025	0.55		0.946419	1.08784	1.15727	1.15727		0.286425	0.350075	0.636501	Derived based on minimum milkfat in solids and moisture percentage.
Romano	product weight	0.2508	0.4092	0.66		0.229128	0.263366	0.280177	0.280177		0.0702683	0.114648	0.184917	Derived based on minimum milkfat in solids and moisture percentage.
Parmesean	product weight	0.2176	0.4624	0.68		0.558294	0.641717	0.682678	0.682678		0.148551	0.31567	0.464221	Derived based on minimum milkfat in solids and moisture percentage.
Mozzarella	product weight	0.18	0.22	0.4		8.74463	10.0513	10.6929	10.6929		1.92472	2.35243	4.27715	Derived based on minimum milkfat in solids and moisture percentage. Values shown for whole milk mozzarella
Ricotta	product weight	0.1298	0.1532	0.283		0.685378	0.78779	0.838075	0.838075		0.108782	0.128393	0.237175	No value reported in AH-697. Used data from NDB.
Swiss	product weight	0.2537	0.3363	0.59		1.01643	1.16831	1.24288	1.24288		0.315319	0.417981	0.733299	Derived based on minimum milkfat in solids and moisture percentage.
Brick	product weight	0.28	0.28	0.56		0.020454	0.0235104	0.025011	0.025011		0.00700309	0.00700309	0.0140062	Derived based on minimum milkfat in solids and moisture percentage.
Muenster	product weight	0.27	0.27	0.54		0.285666	0.328351	0.34931	0.34931		0.0943136	0.0943136	0.188627	Derived based on minimum milkfat in solids and moisture percentage.
Blue	product weight	0.27	0.27	0.54		0.159819	0.1837	0.195426	0.195426		0.0527649	0.0527649	0.10553	Derived based on minimum milkfat in solids and moisture percentage.
cheese, other miscellaneous	product weight	0.268425	0.289075	0.5575		3.78184	4.34694	4.62441	4.62441		1.24131	1.3368	2.57811	Average of Brick, Blue, Muenster, and Swiss
cottage cheese, regular	product weight	0.04	0.16	0.2		0.751156	0.938945	1.06698	1.06698		0.0426793	0.170717	0.213397
cottage cheese, lowfat	product weight	0.005	0.17	0.175		0.948414	1.18552	1.34718	1.34718		0.00673589	0.22902	0.235756
ice cream	product weight	0.1	0.1	0.2		9.15256	11.4407	13.0008	13.0008		1.30008	1.30008	2.60016	Used minimum milkfat and total milk solids standards. No commercial averages reported in Table 16 of AH-697.
lowfat ice cream	product weight	0.02	0.09	0.11		5.91373	7.39216	8.40019	8.40019		0.168004	0.756017	0.924021	Values shown are for ice milk. Used minimum milkfat and total milk solids standards. No commercial averages reported in Table 16 of AH-697.
other frozen deserts	product weight	0.01	0.01	0.02		3.26613	4.08267	4.6394	4.6394		0.046394	0.046394	0.0927879	Values shown are for sherbet. Used minimum milkfat and total milk solids standards. No commercial averages reported in Table 16 of AH-697.
evaporated and condensed milk, canned whole	product weight	0.082	0.1875	0.2695		1.08406	1.35507	1.53986	1.53986		0.126268	0.288723	0.414992	Average of evaporated and condensed milk.
evaporated and condensed milk, bulk whole	product weight	0.082	0.1875	0.2695		0.453662	0.567077	0.644406	0.644406		0.0528413	0.120826	0.173667	Average of evaporated and condensed milk.
evaporated and condensed milk, skim	product weight	0.002	0.298	0.3		3.48891	4.36114	4.95584	4.95584		0.00991167	1.47684	1.48675
dry milk, whole	product weight	0.265	0.71	0.975		0.0537161	0.0542587	0.0616576	0.0616576		0.0163393	0.0437769	0.0601162
dry milk, nonfat	product weight	0.008	0.962	0.97		1.67695	1.69389	1.711	1.711		0.013688	1.64598	1.65967
dry milk, buttermilk	product weight	0.053	0.919	0.972		0.239034	0.241449	0.243888	0.243888		0.0129261	0.224133	0.237059
butter	fat content	0.8	0.01	0.81		2.09588	2.46574	2.65133	3.30178		2.64143	0.0330178	2.67444
light cream	fat content	0.1884	0	0.1884		0.77294	0.966174	1.09793	5.82763		1.09793	0	1.09793
half and half	fat content	0.1091	0	0.1091		0.163891	0.204864	0.2328	2.13382		0.2328	0	0.2328
heavy cream	fat content	0.3586	0	0.3586		0.220165	0.275206	0.312734	0.872096		0.312734	0	0.312734
sour cream	fat content	0.1731	0	0.1731		0.385884	0.482355	0.54813	3.16655		0.54813	0	0.54813
cream cheese	fat content	0.33	0.12	0.45		0.370875	0.463594	0.526812	1.5964		0.526812	0.191568	0.71838	Derived based on minimum milkfat in solids and moisture percentage.
eggnog	fat content	0.0761	0.0825	0.1586		0.0101917	0.0127396	0.0144769	0.190235		0.0144769	0.0156944	0.0301713
						252.413	312.408	352.558	364.262		19.9694	37.8366	57.806
							Milk consumption				Milkfat basis	Skim solids basis	Total solids basis
							Milk equivalents (lbs)				539.714	438.94	469.205
							Conversion, primary to farm weight (lbs primary product per lb farm weight)				0.674917	0.829868	0.776339
							Conversion, primary to farm weight (lbs farm per lb primary product)				1.48166	1.20501	1.2881
							Assumptions				Value	Notes
							Fat content (%)				0.037	Value for whole milk from AH-697, Table 19.
							Skim solids (%)				0.0862	Value for whole milk from AH-697, Table 19.
							Total solids (%)				0.1232	Sum of above values

## Sheet: Fats and oils
FATS AND OILS
The purpose of this table is to decompose primary food commodities in the added fats and oils food group into individual plant oils and animal fats. Dairy fats are not included here since they are all derived from milk and are accounted for in the dairy processing conversions worksheet. The worksheet also contains information on the yield of oil from oilseeds and fat from liveweight of animals. N…
Individual plant oils and animal fats	Salad & cooking oil, proportion × local availability 1	Adjusted proportion, Salad & Cooking Oil	Other edible fats & oils, proportion × local availability 2	Adjusted proportion, Other Edible Fats & Oils	Margarine, proportion × local availability 3	Adjusted proportion, Margarine	Shortening, proportion × local availability 4	Adjusted proportion, Shortening	Conversion (lbs product per lb farm commodity)	Conversion (lbs farm commodity / lb product)	Data Source for Conversion Factors
Soybean oil (refined)	0.7	0.842359	0.4	0.571429	0.943	1	0.8495	1	0.178	5.61798	Source: Table 31 in Agricultural Handbook 697.
Cottonseed	0	0	0	0	D	D	0	0	0.1503	6.65336	Source: Tables 59 (0.167 ton crude oil per ton of cottonseed) and Table 34 (0.9 conversion efficienty for refined oil from crude oil) in Agricultural Handbook 697.
Corn oil (refined)	0	0	0	0	0	0	0	0	0.0285714	35	Source: Table 27 in Agricultural Handbook 697.
Peanut oil (refined)	D	D	0.15	0.214286	NR	NR	NR	NR	0.2852	3.50631	Source: Tables 32 and 34 in Agricultural Handbook 697.
Canola (edible rapeseed) oil	0.087	0.104693	0.15	0.214286	NR	NR	NR	NR	0.4032	2.48016	Source: Canola seed is 42% oil (source: www.canolacouncil.org/uploads/Oilprocessing.pdfSimilar [accessed Mar. 6, 2012]). Table 34 of Agricultural Handbook 697 provides a conversion from crude oil to refined @ 96% (4% loss). Canola Council of Canada states 96% processing yield with hexane extraction and 75 to 85% with mechanical (cold pressing) @ website http://www.canolainfo.org/canola/index.php?…
Olive oil	0.044	0.0529483	NR	NR	NR	NR	NR	NR	0.152	6.57895	Sources: "Understanding Olive Oil Yield" by Paul Vossen with U of California (Sonoma Co.) available at cenapa.ucdavis.edu/files/52581.pdf and USDA AH-697.
Animal Fats (avg. of the two above)	NR	NR	NR	NR	0	0	NR	NR	0.082078	13.438	Average of lard and beef tallow
Lard	NR	NR	NR	NR	NR	NR	0	0	0.057	17.5439	Source: Table 13 in Agricultural Handbook 697.
Edible Tallow	NR	NR	NR	NR	NR	NR	0	0	0.107156	9.33219	Source: Tables 8 and 11 in Agricultural Handbook 697.
Subtotal	0.831	1	0.7	1	0.943	1	0.8495	1
D = data not disclosed in the Oil Crops Yearbook
NR = plant oil or animal fat is not reported in the Oil Crops Yearbook for the food commodity in question
1 - Values are the product of the proportion derived from Table 37 of the Oil Crops Yearbook and the local availability value shown in the food preferences worksheet. Proportions were derived from the weights reported in the Oil Crops Yearbook for individual plant oils and total oils in the food commodity. Proportions were calculated using data from 2001-2010. The proportion is embedded in the ce…
2 - Proportion composed by soybean oil obtained from USDA-ERS (personal communication w/ Mark Ash on 19 March 2012). Remainder of Other edible fats and oils assumed to come from cottonseed, corn, peanut, and canola oils. Values shown are the product of this proportion and the local availability value shown in the food preferences worksheet. Proportions are embedded in the cell formulas.
3 - Values are the product of the proportion derived from Table 41 of the Oil Crops Yearbook and the local availability value shown in the food preferences worksheet. Proportions were derived from the weights reported in the Oil Crops Yearbook for individual plant oils and total oils in the food commodity. Proportions were calculated using data from 2001-2007, data were undisclosed from 2008 onwa…
4 - Values are the product of the proportion derived from Table 39 of the Oil Crops Yearbook and the local availability value shown in the food preferences worksheet. Proportions were derived from the weights reported in the Oil Crops Yearbook for individual plant oils and total oils in the food commodity. Proportions were calculated using data from 2001-2010. The proportion is embedded in the ce…

## Sheet: Livestock feed requirements
LIVESTOCK RATIONS AND FEED EFFICIENCIES
This worksheet reports the assumptions made regarding livestock feed requirements. The values shown are from a model of livestock feed requirements from Peters et al. (2014) published in Agricultural Systems. Feed needs are reported on an as-fed basis. Note that the dry matter percentages reported in feed composition data differ from the dry matter percentages used to normalize USDA crop yields. …
Livestock class (final product = retail weight = edible boneless meat, raw whole eggs in shell, and raw whole milk)	Corn Grain (as-fed)	Corn Grain (as-fed)	Corn Grain (as-fed)	Soybean Meal (as-fed)	Soybean Meal (as-fed)	Soybean Meal (as-fed)	Medium Maturity Grass Hay (as-fed)	Medium Maturity Grass Hay (as-fed)	Medium Maturity Grass Hay (as-fed)	Alfalfa Haylage (as-fed)	Alfalfa Haylage (as-fed)	Alfalfa Haylage (as-fed)	Corn Silage (as-fed)	Corn Silage (as-fed)	Corn Silage (as-fed)	Grazed forage (DM)	Grazed forage (DM)	Grazed forage (DM)
	[lb feed/ lb liveweight]	[lb feed/ lb carcass weight]	[lb feed/ lb retail weight]	[lb feed/ lb liveweight]	[lb feed/ lb carcass weight]	[lb feed/ lb retail weight]	[lb feed/ lb liveweight]	[lb feed/ lb carcass weight]	[lb feed/ lb retail weight]	[lb feed/ lb liveweight]	[lb feed/ lb carcass weight]	[lb feed/ lb retail weight]	[lb feed/ lb liveweight]	[lb feed/ lb carcass weight]	[lb feed/ lb retail weight]	[lb feed/ lb liveweight]	[lb feed/ lb carcass weight]	[lb feed/ lb retail weight]
Layers (eggs)	2.01024	N/A	N/A	0.566421	N/A	N/A	N/A	N/A	N/A	N/A	N/A	N/A	N/A	N/A	N/A	N/A	N/A	N/A
Broilers (chicken meat)	1.43068	1.97009	3.27258	0.677339	0.932716	1.54936	N/A	N/A	N/A	N/A	N/A	N/A	N/A	N/A	N/A	N/A	N/A	N/A
Turkeys (turkey meat)	1.99454	2.51963	3.18941	0.972089	1.22801	1.55444	N/A	N/A	N/A	N/A	N/A	N/A	N/A	N/A	N/A	N/A	N/A	N/A
Beef Cattle	2.14079	3.55613	5.31558	0.131534	0.218495	0.326599	5.08802	8.45186	12.6336	N/A	N/A	N/A	N/A	N/A	N/A	7.61115	12.6431	18.8985
Dairy (whole milk)	0.132847	N/A	N/A	0.0735702	N/A	N/A	0.242928	N/A	N/A	0.418025	N/A	N/A	0.955532	N/A	N/A	N/A	N/A	N/A
Veal Beef --> NA, already accounted	N/A	N/A	N/A	N/A	N/A	N/A	N/A	N/A	N/A	N/A	N/A	N/A	N/A	N/A	N/A	N/A	N/A	N/A
Dairy Beef	1.79272	2.9728	4.43979	0.252405	0.418554	0.625098	1.41475	2.34603	3.50372	0.261635	0.43386	0.647957	0.598052	0.991728	1.48112	N/A	N/A	N/A
Swine (pork)	2.36533	3.21814	4.41446	0.572845	0.779381	1.06911	N/A	N/A	N/A	N/A	N/A	N/A	N/A	N/A	N/A	N/A	N/A	N/A
Feed Moisture Conversions	Corn Grain			Soybeans			Medium Maturity Grass Hay			Alfalfa Haylage			Corn Silage
Dairy One Dry Matter Assumption	0.89364			0.90081			0.91447			0.402			0.337
NASS Moisture Assumption (provided by Travis Thorson, Jan. 17, 2013)	0.155		1.05756	0.125			0.13			0.13			No standard used -- moisture will vary
NASS DM Assumption	0.845	1.79643	2.12595	0.875			0.87			0.87			NA
Conversion Factor from Dairy One to NASS	1.05756		1.05756	1.0295			1.05111			0.462069			1
Feed to Crop Conversions	Corn Grain			Soybean Meal			Medium Maturity Grass Hay			Alfalfa Haylage			Corn Silage
lb crop per lb feed	1			1.25786			1.05			1.1			1
Calculation of Proportions of Dairy Beef and Dedicated Beef
Parameter and units	Value	Notes
Milk consumption (lbs per capita/year)	504.856	Value in fluid milk equivalents from all dairy products.
Milk production (lbs/cow/year)	22920	From Livestock Requirements workbook.
Milking cows needed (# per capita)	0.0220269
Beef consumption (lbs per capita/year)	39.2825	Value in boneless meat equivalents at primary processing level.
Beef production per dairy cow (lbs boneless meat/year)	343.535	From Livestock Requirements workbook.
Beef production per milking cows needed (lbs boneless meat per capita/year)	7.56699	Based on number of milking cows needed per capita.
Beef production needed from dedicated beef herd (lbs per capita/year)	31.7155
Percent "dairy" beef	0.19263
Percent "Dedicated" beef	0.80737

[truncated: 6 more sheets: Food requirements, Crop and grazing yields, Land requirements, Multiuse crop adjustment, Grazing land adjustment, Land availability]
